# Supplementary material
Source: publisher site journal article supplement (https://www.spandidos-publications.com/2474/downloadSupplementary)
Supplement: Supplementary file 1 [file downloadSupplementary]

## Sheet: Sheet1
	Table SIII. Motifs were identified using Motif-X.
	Motif Logo	Motif	Motif Score	Foreground		Background		Fold Increase
				Matches	Size	Matches	Size
		...RP.SP.....	38.63	52	5317	620	1094911	17.27
		...R..SP.P...	43.1	85	5265	632	1094291	27.95
		....P.SP.....	32	340	5180	9397	1093659	7.64
		...R..SP.....	32	220	4840	4181	1084262	11.79
		......SP...R.	32	172	4620	4293	1080081	9.37
		......SP....K	31.48	115	4448	2785	1075788	9.99
		....R.SP.....	29.67	137	4333	4072	1073003	8.33
		...RR.S......	32	253	4196	5073	1068931	12.7
		......SP.R...	29.18	110	3943	3248	1063858	9.14
		K.....SP.....	25.34	75	3833	2351	1060610	8.83
		.R....SP.....	24.17	81	3758	2960	1058259	7.71
		...RS.S......	29.07	160	3677	6942	1055299	6.61
		......SD.E.E.	39.52	55	3517	626	1048357	26.19
		......SP.K...	22.93	59	3462	2157	1047731	8.28
		......SDEE...	42.04	35	3403	476	1045574	22.59
		......SE.EE..	39.84	41	3368	872	1045098	14.59
		...K..SP.....	22.61	52	3327	1937	1044226	8.43
		......SDDE...	40.89	30	3275	307	1042289	31.1
		..KR..S......	27.1	71	3245	2602	1041982	8.76
		...G..SP.....	22.34	79	3174	3761	1039380	6.88
		.....DSE.E...	38.96	28	3095	458	1035619	20.46
		......SD.E...	31.95	70	3067	3172	1035161	7.45
		...R..S..D...	26.39	55	2997	1989	1031989	9.52
		.....RSP.....	22.95	51	2942	2090	1030000	8.54
		......S.ED...	31.65	81	2891	4291	1027910	6.71
		...R..S..E...	24.18	59	2810	2785	1023619	7.72
		......SP.....	16	406	2751	39665	1020834	3.8
		...R..S.D....	22.56	38	2345	1756	981169	9.05
		...R..S......	16	318	2307	39493	979413	3.42
		......S.DE...	31.48	55	1989	2866	939920	9.07
		...KR.S......	27.55	53	1934	3101	937054	8.28
		......S.EE...	31.65	80	1881	6153	933953	6.46
		.....GS..D...	23.79	31	1801	2614	927800	6.11
		....RRS......	22.9	43	1770	3613	925186	6.22
		.....GS......	16	218	1727	64445	921573	1.81
		.....DSD.D...	39.5	24	1509	350	857128	38.95
		......S..DL..	22.46	43	1485	3923	856778	6.32
		....R.S......	16	172	1442	39916	852855	2.55
		...KS.S......	23.76	34	1270	4138	812939	5.26
		.....DSD.....	26.16	31	1236	2099	808801	9.66
		......SDD....	24.51	24	1205	1587	806702	10.12
		......S..D...	16	110	1181	30848	805115	2.43
		......S..E...	16	134	1071	43535	774267	2.23
		R.....S.E....	22	23	937	2335	730732	7.68
		......S.E....	12.73	105	914	38534	728397	2.17
		......S.D....	12.82	88	809	31583	689863	2.38
		......S..R...	9.95	91	721	40505	658280	2.05
		..R...S......	9.59	74	630	32806	617775	2.21
		.....RS......	8.31	63	556	29896	584969	2.22
		..K...S......	8.85	61	493	29599	555073	2.32
		......S.R....	7.84	54	432	28501	525474	2.3
		...K..S......	8.64	48	378	24305	496973	2.6
		......S.K....	6.04	40	330	24758	472668	2.31
		...R..TPP....	42	33	636	276	687043	129.16
		......TPP....	32	107	603	3937	686767	30.95
		...R..TP.....	32	59	496	2550	682830	31.85
		....P.TP.....	24.83	50	437	4738	680280	16.43
		......TP.....	16	131	387	37129	675542	6.16
		...R..T......	16	53	256	35023	638413	3.77
		......TSP....	26.73	26	203	4542	603390	17.01
		......T..D...	6.65	26	177	27776	598848	3.17

## Sheet: Sheet4
Table SIII. Motifs were identified using Motif-X.
ID	Protein accession	Position	Motif Logo
Q5T1M5-979	Q5T1M5	979	...RP.SP.....
Q01082-2102	Q01082	2102	...RP.SP.....
Q08AE8-387	Q08AE8	387	...RP.SP.....
P07360-31	P07360	31	...RP.SP.....
P31629-2118	P31629	2118	...RP.SP.....
Q86YP4-100	Q86YP4	100	...RP.SP.....
Q9UQ35-323	Q9UQ35	323	...RP.SP.....
Q6ZU35-1017	Q6ZU35	1017	...RP.SP.....
Q9Y3L3-544	Q9Y3L3	544	...RP.SP.....
Q14244-365	Q14244	365	...RP.SP.....
Q8IY33-649	Q8IY33	649	...RP.SP.....
Q7RTP6-1649	Q7RTP6	1649	...RP.SP.....
Q8IWW6-240	Q8IWW6	240	...RP.SP.....
Q63ZY3-375	Q63ZY3	375	...RP.SP.....
Q9BVG9-16	Q9BVG9	16	...RP.SP.....
Q13057-178	Q13057	178	...RP.SP.....
Q15911-2230	Q15911	2230	...RP.SP.....
Q12830-216	Q12830	216	...RP.SP.....
Q9UJX6-314	Q9UJX6	314	...RP.SP.....
Q7Z5K2-221	Q7Z5K2	221	...RP.SP.....
Q6Y7W6-236	Q6Y7W6	236	...RP.SP.....
Q86UU1-324	Q86UU1	324	...RP.SP.....
Q9H6F5-18	Q9H6F5	18	...RP.SP.....
Q5JVS0-108	Q5JVS0	108	...RP.SP.....
Q8N6T7-338	Q8N6T7	338	...RP.SP.....
Q99590-816	Q99590	816	...RP.SP.....
P32519-187	P32519	187	...RP.SP.....
Q5T200-643	Q5T200	643	...RP.SP.....
Q99501-306	Q99501	306	...RP.SP.....
P83369-21	P83369	21	...RP.SP.....
Q9Y6X9-615	Q9Y6X9	615	...RP.SP.....
Q86U90-37	Q86U90	37	...RP.SP.....
Q86UU1-404	Q86UU1	404	...RP.SP.....
Q9P206-929	Q9P206	929	...RP.SP.....
P23677-20	P23677	20	...RP.SP.....
Q9H7L9-234	Q9H7L9	234	...RP.SP.....
Q00613-363	Q00613	363	...RP.SP.....
Q8TAP9-40	Q8TAP9	40	...RP.SP.....
Q8TF72-910	Q8TF72	910	...RP.SP.....
Q92560-521	Q92560	521	...RP.SP.....
Q9HCE5-399	Q9HCE5	399	...RP.SP.....
Q8WUZ0-126	Q8WUZ0	126	...RP.SP.....
Q96RU2-1053	Q96RU2	1053	...RP.SP.....
P08572-1475	P08572	1475	...RP.SP.....
Q93074-635	Q93074	635	...RP.SP.....
Q86V48-745	Q86V48	745	...RP.SP.....
Q96T58-736	Q96T58	736	...RP.SP.....
Q13625-698	Q13625	698	...RP.SP.....
Q9UGJ0-87	Q9UGJ0	87	...RP.SP.....
P48637-415	P48637	415	...RP.SP.....
Q15052-225	Q15052	225	...RP.SP.....
Q5T5P2-361	Q5T5P2	361	...RP.SP.....
Q92922-328	Q92922	328	...R..SP.P...
Q8TAQ2-302	Q8TAQ2	302	...R..SP.P...
Q8TAQ2-304	Q8TAQ2	304	...R..SP.P...
Q8IYB3-626	Q8IYB3	626	...R..SP.P...
Q8IYB3-562	Q8IYB3	562	...R..SP.P...
Q9H7N4-500	Q9H7N4	500	...R..SP.P...
Q13595-260	Q13595	260	...R..SP.P...
Q8IYB3-616	Q8IYB3	616	...R..SP.P...
P49450-19	P49450	19	...R..SP.P...
Q8IYB3-605	Q8IYB3	605	...R..SP.P...
Q7Z5L9-360	Q7Z5L9	360	...R..SP.P...
Q8IYB3-551	Q8IYB3	551	...R..SP.P...
Q9H1B7-547	Q9H1B7	547	...R..SP.P...
Q8IYB3-549	Q8IYB3	549	...R..SP.P...
Q9H7N4-498	Q9H7N4	498	...R..SP.P...
Q5VUA4-79	Q5VUA4	79	...R..SP.P...
Q8IYB3-583	Q8IYB3	583	...R..SP.P...
Q8IWX8-817	Q8IWX8	817	...R..SP.P...
Q6ZRV2-914	Q6ZRV2	914	...R..SP.P...
Q13094-207	Q13094	207	...R..SP.P...
Q1KMD3-228	Q1KMD3	228	...R..SP.P...
Q8IYB3-560	Q8IYB3	560	...R..SP.P...
Q9UDY2-296	Q9UDY2	296	...R..SP.P...
P49761-157	P49761	157	...R..SP.P...
Q9Y2V2-30	Q9Y2V2	30	...R..SP.P...
Q15637-82	Q15637	82	...R..SP.P...
Q9UQ35-2581	Q9UQ35	2581	...R..SP.P...
Q15287-157	Q15287	157	...R..SP.P...
Q5SYE7-1386	Q5SYE7	1386	...R..SP.P...
Q96GP6-687	Q96GP6	687	...R..SP.P...
Q8IX07-901	Q8IX07	901	...R..SP.P...
Q9BSL1-98	Q9BSL1	98	...R..SP.P...
Q8IU81-384	Q8IU81	384	...R..SP.P...
Q14687-826	Q14687	826	...R..SP.P...
Q01130-191	Q01130	191	...R..SP.P...
Q92619-23	Q92619	23	...R..SP.P...
Q13523-356	Q13523	356	...R..SP.P...
Q9UQ35-2702	Q9UQ35	2702	...R..SP.P...
Q6UXY1-465	Q6UXY1	465	...R..SP.P...
O14497-696	O14497	696	...R..SP.P...
Q6ZRV2-881	Q6ZRV2	881	...R..SP.P...
Q6ZUJ8-759	Q6ZUJ8	759	...R..SP.P...
Q14160-1475	Q14160	1475	...R..SP.P...
P84103-108	P84103	108	...R..SP.P...
P49450-17	P49450	17	...R..SP.P...
Q6UN15-492	Q6UN15	492	...R..SP.P...
P29590-36	P29590	36	...R..SP.P...
Q5TZA2-1451	Q5TZA2	1451	...R..SP.P...
Q2KJY2-1006	Q2KJY2	1006	...R..SP.P...
Q96MU7-146	Q96MU7	146	...R..SP.P...
Q9UDY2-966	Q9UDY2	966	...R..SP.P...
P49585-329	P49585	329	...R..SP.P...
Q9Y2W1-264	Q9Y2W1	264	...R..SP.P...
Q5T200-265	Q5T200	265	...R..SP.P...
O75382-7	O75382	7	...R..SP.P...
P20749-41	P20749	41	...R..SP.P...
Q13247-303	Q13247	303	...R..SP.P...
Q9UDY2-986	Q9UDY2	986	...R..SP.P...
Q6ZRV2-925	Q6ZRV2	925	...R..SP.P...
Q9HCK8-1995	Q9HCK8	1995	...R..SP.P...
P85037-445	P85037	445	...R..SP.P...
P52294-244	P52294	244	...R..SP.P...
Q7L4I2-222	Q7L4I2	222	...R..SP.P...
Q5T200-372	Q5T200	372	...R..SP.P...
Q9NR19-30	Q9NR19	30	...R..SP.P...
A2AJT9-17	A2AJT9	17	...R..SP.P...
Q13523-578	Q13523	578	...R..SP.P...
Q13247-316	Q13247	316	...R..SP.P...
Q9UQ88-740	Q9UQ88	740	...R..SP.P...
O96013-104	O96013	104	...R..SP.P...
Q8N5Y2-400	Q8N5Y2	400	...R..SP.P...
Q96LT9-108	Q96LT9	108	...R..SP.P...
Q01167-398	Q01167	398	...R..SP.P...
Q8IYB3-713	Q8IYB3	713	...R..SP.P...
Q8WUF5-158	Q8WUF5	158	...R..SP.P...
O75179-2401	O75179	2401	...R..SP.P...
Q5JWF2-625	Q5JWF2	625	...R..SP.P...
Q15059-263	Q15059	263	...R..SP.P...
Q9P1Y6-1202	Q9P1Y6	1202	...R..SP.P...
Q86VM9-868	Q86VM9	868	...R..SP.P...
Q96EP0-437	Q96EP0	437	...R..SP.P...
Q9H7N4-719	Q9H7N4	719	...R..SP.P...
Q9UMS6-902	Q9UMS6	902	...R..SP.P...
Q9HBL0-1381	Q9HBL0	1381	...R..SP.P...
Q13112-410	Q13112	410	...R..SP.P...
Q06413-396	Q06413	396	....P.SP.....
Q02078-408	Q02078	408	....P.SP.....
P27816-696	P27816	696	....P.SP.....
Q7L8A9-313	Q7L8A9	313	....P.SP.....
Q86SQ0-334	Q86SQ0	334	....P.SP.....
Q86WB0-395	Q86WB0	395	....P.SP.....
Q3L8U1-2079	Q3L8U1	2079	....P.SP.....
O95685-78	O95685	78	....P.SP.....
Q9H1E3-214	Q9H1E3	214	....P.SP.....
Q3YBM2-258	Q3YBM2	258	....P.SP.....
Q69YN4-1579	Q69YN4	1579	....P.SP.....
Q9NZT2-378	Q9NZT2	378	....P.SP.....
Q86SQ0-204	Q86SQ0	204	....P.SP.....
Q5T5U3-252	Q5T5U3	252	....P.SP.....
Q86W92-579	Q86W92	579	....P.SP.....
P17480-484	P17480	484	....P.SP.....
O75694-992	O75694	992	....P.SP.....
Q53GL7-431	Q53GL7	431	....P.SP.....
Q6JBY9-351	Q6JBY9	351	....P.SP.....
Q96EV2-765	Q96EV2	765	....P.SP.....
Q8TBN0-168	Q8TBN0	168	....P.SP.....
Q12888-552	Q12888	552	....P.SP.....
Q96JM3-542	Q96JM3	542	....P.SP.....
P62070-186	P62070	186	....P.SP.....
Q5VZK9-1094	Q5VZK9	1094	....P.SP.....
Q9UPQ3-521	Q9UPQ3	521	....P.SP.....
Q00613-303	Q00613	303	....P.SP.....
Q9NVD7-19	Q9NVD7	19	....P.SP.....
Q71RC2-583	Q71RC2	583	....P.SP.....
Q9ULW0-738	Q9ULW0	738	....P.SP.....
Q9UHJ3-775	Q9UHJ3	775	....P.SP.....
Q96JM3-214	Q96JM3	214	....P.SP.....
Q9P2R6-594	Q9P2R6	594	....P.SP.....
O75152-108	O75152	108	....P.SP.....
O15021-1782	O15021	1782	....P.SP.....
Q96T23-748	Q96T23	748	....P.SP.....
P21333-1630	P21333	1630	....P.SP.....
Q96JK2-794	Q96JK2	794	....P.SP.....
Q9NYB9-183	Q9NYB9	183	....P.SP.....
Q7RTP6-1143	Q7RTP6	1143	....P.SP.....
Q8NI35-522	Q8NI35	522	....P.SP.....
O00499-331	O00499	331	....P.SP.....
Q9Y6G9-207	Q9Y6G9	207	....P.SP.....
O43306-54	O43306	54	....P.SP.....
Q6PKG0-774	Q6PKG0	774	....P.SP.....
Q01130-212	Q01130	212	....P.SP.....
Q8IYB8-725	Q8IYB8	725	....P.SP.....
Q6WCQ1-365	Q6WCQ1	365	....P.SP.....
O94875-302	O94875	302	....P.SP.....
Q8IWI9-449	Q8IWI9	449	....P.SP.....
P02545-22	P02545	22	....P.SP.....
Q9H6F5-47	Q9H6F5	47	....P.SP.....
Q8TAP8-87	Q8TAP8	87	....P.SP.....
Q9ULJ3-435	Q9ULJ3	435	....P.SP.....
Q9NTI5-1166	Q9NTI5	1166	....P.SP.....
Q8ND82-80	Q8ND82	80	....P.SP.....
P25098-670	P25098	670	....P.SP.....
Q08174-984	Q08174	984	....P.SP.....
Q86XL3-268	Q86XL3	268	....P.SP.....
O43314-1016	O43314	1016	....P.SP.....
Q9UGJ0-117	Q9UGJ0	117	....P.SP.....
Q7Z3K3-425	Q7Z3K3	425	....P.SP.....
Q92615-664	Q92615	664	....P.SP.....
P11182-220	P11182	220	....P.SP.....
Q96C19-74	Q96C19	74	....P.SP.....
Q8WWM7-449	Q8WWM7	449	....P.SP.....
Q13586-575	Q13586	575	....P.SP.....
Q9Y548-43	Q9Y548	43	....P.SP.....
Q8TEW8-1162	Q8TEW8	1162	....P.SP.....
Q9P270-48	Q9P270	48	....P.SP.....
Q9H5H4-83	Q9H5H4	83	....P.SP.....
Q9BVC5-193	Q9BVC5	193	....P.SP.....
Q86WB0-321	Q86WB0	321	....P.SP.....
P40222-515	P40222	515	....P.SP.....
O95425-245	O95425	245	....P.SP.....
Q9H6F5-113	Q9H6F5	113	....P.SP.....
Q96AY4-28	Q96AY4	28	....P.SP.....
O15014-576	O15014	576	....P.SP.....
Q9HBL0-1192	Q9HBL0	1192	....P.SP.....
Q14676-793	Q14676	793	....P.SP.....
Q07157-1617	Q07157	1617	....P.SP.....
O14686-1671	O14686	1671	....P.SP.....
Q9BTA9-511	Q9BTA9	511	....P.SP.....
P20700-23	P20700	23	....P.SP.....
Q14CZ8-384	Q14CZ8	384	....P.SP.....
Q8N2Y8-536	Q8N2Y8	536	....P.SP.....
Q9BU76-220	Q9BU76	220	....P.SP.....
Q92608-1685	Q92608	1685	....P.SP.....
Q9P1Y6-1360	Q9P1Y6	1360	....P.SP.....
Q9BRL6-273	Q9BRL6	273	....P.SP.....
Q8N122-863	Q8N122	863	....P.SP.....
Q8N556-668	Q8N556	668	....P.SP.....
O95466-1031	O95466	1031	....P.SP.....
Q03252-37	Q03252	37	....P.SP.....
Q8NEZ4-4267	Q8NEZ4	4267	....P.SP.....
Q02952-1331	Q02952	1331	....P.SP.....
Q9H981-132	Q9H981	132	....P.SP.....
Q14839-1535	Q14839	1535	....P.SP.....
Q6PL18-342	Q6PL18	342	....P.SP.....
Q7Z434-152	Q7Z434	152	....P.SP.....
P14866-101	P14866	101	....P.SP.....
Q9H5H4-125	Q9H5H4	125	....P.SP.....
Q2M2I8-624	Q2M2I8	624	....P.SP.....
P13807-645	P13807	645	....P.SP.....
Q96JM3-416	Q96JM3	416	....P.SP.....
Q9BYP7-1585	Q9BYP7	1585	....P.SP.....
P42331-362	P42331	362	....P.SP.....
Q9Y618-2234	Q9Y618	2234	....P.SP.....
Q8IZP0-183	Q8IZP0	183	....P.SP.....
P22415-186	P22415	186	....P.SP.....
Q9UBW7-838	Q9UBW7	838	....P.SP.....
O75376-158	O75376	158	....P.SP.....
Q16666-153	Q16666	153	....P.SP.....
Q15554-365	Q15554	365	....P.SP.....
Q8WUA4-893	Q8WUA4	893	....P.SP.....
Q9UQ35-333	Q9UQ35	333	....P.SP.....
Q96T23-622	Q96T23	622	....P.SP.....
Q8N5H7-440	Q8N5H7	440	....P.SP.....
Q9UMS6-604	Q9UMS6	604	....P.SP.....
Q13796-313	Q13796	313	....P.SP.....
P23508-294	P23508	294	....P.SP.....
Q04726-286	Q04726	286	....P.SP.....
P55196-1696	P55196	1696	....P.SP.....
Q9BSE4-94	Q9BSE4	94	....P.SP.....
Q6PJT7-515	Q6PJT7	515	....P.SP.....
Q9H6S3-570	Q9H6S3	570	....P.SP.....
Q07955-199	Q07955	199	....P.SP.....
Q96E09-76	Q96E09	76	....P.SP.....
P55196-1182	P55196	1182	....P.SP.....
Q9BXS9-752	Q9BXS9	752	....P.SP.....
P85037-213	P85037	213	....P.SP.....
O75909-329	O75909	329	....P.SP.....
Q9HBL0-1177	Q9HBL0	1177	....P.SP.....
O95425-50	O95425	50	....P.SP.....
O60264-116	O60264	116	....P.SP.....
Q13884-87	Q13884	87	....P.SP.....
Q13136-708	Q13136	708	....P.SP.....
Q9NQG6-59	Q9NQG6	59	....P.SP.....
Q9UJM3-326	Q9UJM3	326	....P.SP.....
Q8WWM7-111	Q8WWM7	111	....P.SP.....
Q08J23-743	Q08J23	743	....P.SP.....
Q9HBI1-7	Q9HBI1	7	....P.SP.....
Q53EL6-94	Q53EL6	94	....P.SP.....
Q9H5H4-97	Q9H5H4	97	....P.SP.....
Q8TE67-205	Q8TE67	205	....P.SP.....
Q86YP4-114	Q86YP4	114	....P.SP.....
Q9ULH0-1555	Q9ULH0	1555	....P.SP.....
Q7Z569-117	Q7Z569	117	....P.SP.....
Q6SPF0-161	Q6SPF0	161	....P.SP.....
P16949-38	P16949	38	....P.SP.....
Q16204-244	Q16204	244	....P.SP.....
Q9HBL0-915	Q9HBL0	915	....P.SP.....
Q14247-418	Q14247	418	....P.SP.....
Q5THJ4-1765	Q5THJ4	1765	....P.SP.....
Q96Q05-953	Q96Q05	953	....P.SP.....
O15020-2359	O15020	2359	....P.SP.....
Q13501-272	Q13501	272	....P.SP.....
P35658-430	P35658	430	....P.SP.....
O95758-56	O95758	56	....P.SP.....
Q12888-1114	Q12888	1114	....P.SP.....
Q6ZRS2-1859	Q6ZRS2	1859	....P.SP.....
P15336-328	P15336	328	....P.SP.....
Q6IQ23-569	Q6IQ23	569	....P.SP.....
Q5TZA2-1460	Q5TZA2	1460	....P.SP.....
Q15149-4396	Q15149	4396	....P.SP.....
P78559-2022	P78559	2022	....P.SP.....
O95396-47	O95396	47	....P.SP.....
Q9Y2D5-152	Q9Y2D5	152	....P.SP.....
Q00341-944	Q00341	944	....P.SP.....
Q9H6F5-69	Q9H6F5	69	....P.SP.....
Q9UHB6-490	Q9UHB6	490	....P.SP.....
Q13796-1039	Q13796	1039	....P.SP.....
Q53GA4-42	Q53GA4	42	....P.SP.....
O95400-195	O95400	195	....P.SP.....
Q9UQ35-440	Q9UQ35	440	....P.SP.....
P46019-1044	P46019	1044	....P.SP.....
Q9BTU6-51	Q9BTU6	51	....P.SP.....
P24928-1913	P24928	1913	....P.SP.....
Q14980-1757	Q14980	1757	....P.SP.....
Q8NC06-166	Q8NC06	166	....P.SP.....
C9JLW8-21	C9JLW8	21	....P.SP.....
Q96IF1-137	Q96IF1	137	....P.SP.....
O75427-521	O75427	521	....P.SP.....
Q659C4-343	Q659C4	343	....P.SP.....
Q765P7-601	Q765P7	601	....P.SP.....
P46013-308	P46013	308	....P.SP.....
O75381-232	O75381	232	....P.SP.....
Q96L91-1732	Q96L91	1732	....P.SP.....
Q08495-96	Q08495	96	....P.SP.....
P31943-104	P31943	104	....P.SP.....
Q8NHJ6-377	Q8NHJ6	377	....P.SP.....
Q86VM9-487	Q86VM9	487	....P.SP.....
Q9NYB0-203	Q9NYB0	203	....P.SP.....
O00512-687	O00512	687	....P.SP.....
Q08495-26	Q08495	26	....P.SP.....
Q15746-1779	Q15746	1779	....P.SP.....
A0JNW5-418	A0JNW5	418	....P.SP.....
O96013-291	O96013	291	....P.SP.....
Q63ZY3-323	Q63ZY3	323	....P.SP.....
Q9UQ35-424	Q9UQ35	424	....P.SP.....
O14924-850	O14924	850	....P.SP.....
Q92738-585	Q92738	585	....P.SP.....
Q00613-307	Q00613	307	....P.SP.....
Q5T4S7-2719	Q5T4S7	2719	....P.SP.....
Q9Y613-523	Q9Y613	523	....P.SP.....
Q9BX66-350	Q9BX66	350	....P.SP.....
Q9HBL0-1269	Q9HBL0	1269	....P.SP.....
P28715-526	P28715	526	....P.SP.....
Q6JBY9-216	Q6JBY9	216	....P.SP.....
Q92613-85	Q92613	85	....P.SP.....
Q96A56-156	Q96A56	156	....P.SP.....
Q14681-33	Q14681	33	....P.SP.....
P85037-420	P85037	420	....P.SP.....
Q9Y4E8-229	Q9Y4E8	229	....P.SP.....
P08263-202	P08263	202	....P.SP.....
A6NDB9-155	A6NDB9	155	....P.SP.....
Q5M775-847	Q5M775	847	....P.SP.....
Q8NDX1-143	Q8NDX1	143	....P.SP.....
P21333-2128	P21333	2128	....P.SP.....
Q9BZL4-509	Q9BZL4	509	....P.SP.....
P85037-257	P85037	257	....P.SP.....
Q12873-713	Q12873	713	....P.SP.....
Q12888-380	Q12888	380	....P.SP.....
P11831-224	P11831	224	....P.SP.....
Q6VMQ6-673	Q6VMQ6	673	....P.SP.....
Q8N8A6-83	Q8N8A6	83	....P.SP.....
Q9Y2H5-459	Q9Y2H5	459	....P.SP.....
Q96AQ6-43	Q96AQ6	43	....P.SP.....
Q9P206-545	Q9P206	545	....P.SP.....
Q9UK61-1103	Q9UK61	1103	....P.SP.....
P21333-1946	P21333	1946	....P.SP.....
Q9UQ35-2449	Q9UQ35	2449	....P.SP.....
Q96JM7-608	Q96JM7	608	....P.SP.....
P49815-1452	P49815	1452	....P.SP.....
P28715-341	P28715	341	....P.SP.....
Q92613-566	Q92613	566	....P.SP.....
Q9Y5S2-1690	Q9Y5S2	1690	....P.SP.....
Q9BQG0-11	Q9BQG0	11	....P.SP.....
P41252-1047	P41252	1047	....P.SP.....
Q9P1Y5-368	Q9P1Y5	368	....P.SP.....
Q8NCF5-204	Q8NCF5	204	....P.SP.....
P18887-447	P18887	447	....P.SP.....
Q04637-1231	Q04637	1231	....P.SP.....
Q5VZK9-1288	Q5VZK9	1288	....P.SP.....
Q9NUU7-85	Q9NUU7	85	....P.SP.....
Q9H0F6-165	Q9H0F6	165	....P.SP.....
O00429-616	O00429	616	....P.SP.....
P19838-907	P19838	907	....P.SP.....
P35658-678	P35658	678	....P.SP.....
Q96F44-85	Q96F44	85	....P.SP.....
Q92610-334	Q92610	334	....P.SP.....
Q99973-397	Q99973	397	....P.SP.....
O00267-666	O00267	666	....P.SP.....
Q96QH2-252	Q96QH2	252	....P.SP.....
Q9Y6G9-516	Q9Y6G9	516	....P.SP.....
O14497-363	O14497	363	....P.SP.....
Q9NUL3-492	Q9NUL3	492	....P.SP.....
Q96E09-143	Q96E09	143	....P.SP.....
Q9Y4H4-39	Q9Y4H4	39	....P.SP.....
Q14247-405	Q14247	405	....P.SP.....
P29590-527	P29590	527	....P.SP.....
P37275-322	P37275	322	....P.SP.....
Q7KZI7-456	Q7KZI7	456	....P.SP.....
Q92888-863	Q92888	863	....P.SP.....
Q6NY19-177	Q6NY19	177	....P.SP.....
Q13586-621	Q13586	621	....P.SP.....
Q66K74-759	Q66K74	759	....P.SP.....
Q99576-122	Q99576	122	....P.SP.....
Q9P206-673	Q9P206	673	....P.SP.....
Q3KQU3-544	Q3KQU3	544	....P.SP.....
Q92835-971	Q92835	971	....P.SP.....
Q8N3V7-854	Q8N3V7	854	....P.SP.....
Q86X27-329	Q86X27	329	....P.SP.....
Q9UHB7-1058	Q9UHB7	1058	....P.SP.....
O15021-1394	O15021	1394	....P.SP.....
Q6ZRS2-3016	Q6ZRS2	3016	....P.SP.....
Q9HBL0-1314	Q9HBL0	1314	....P.SP.....
Q9H1B7-662	Q9H1B7	662	....P.SP.....
O14497-382	O14497	382	....P.SP.....
Q7Z434-222	Q7Z434	222	....P.SP.....
O75128-815	O75128	815	....P.SP.....
O43310-299	O43310	299	....P.SP.....
A7E2V4-1092	A7E2V4	1092	....P.SP.....
Q9H7L9-237	Q9H7L9	237	....P.SP.....
O94887-876	O94887	876	....P.SP.....
O60307-348	O60307	348	....P.SP.....
Q8N9T8-628	Q8N9T8	628	....P.SP.....
Q13884-219	Q13884	219	....P.SP.....
Q9UBW5-436	Q9UBW5	436	....P.SP.....
P13994-362	P13994	362	....P.SP.....
Q5VY43-1029	Q5VY43	1029	....P.SP.....
Q63HR2-1003	Q63HR2	1003	....P.SP.....
Q5VZ89-737	Q5VZ89	737	....P.SP.....
Q9UHB6-362	Q9UHB6	362	....P.SP.....
Q13425-95	Q13425	95	....P.SP.....
Q6ZN18-24	Q6ZN18	24	....P.SP.....
O60504-545	O60504	545	....P.SP.....
Q6VMQ6-113	Q6VMQ6	113	....P.SP.....
Q13573-224	Q13573	224	....P.SP.....
Q9ULH1-843	Q9ULH1	843	....P.SP.....
Q9UBS8-451	Q9UBS8	451	....P.SP.....
Q63HR2-893	Q63HR2	893	....P.SP.....
Q14160-853	Q14160	853	....P.SP.....
Q9BZF1-68	Q9BZF1	68	....P.SP.....
Q8WX93-1104	Q8WX93	1104	....P.SP.....
Q5SRE5-1709	Q5SRE5	1709	....P.SP.....
O75676-347	O75676	347	....P.SP.....
Q96JM3-427	Q96JM3	427	....P.SP.....
O60504-530	O60504	530	....P.SP.....
P46821-1265	P46821	1265	....P.SP.....
Q8NCD3-473	Q8NCD3	473	....P.SP.....
P40763-727	P40763	727	....P.SP.....
Q9UGJ0-71	Q9UGJ0	71	....P.SP.....
Q14160-1448	Q14160	1448	....P.SP.....
P48681-471	P48681	471	....P.SP.....
P35606-859	P35606	859	....P.SP.....
Q96RK0-1294	Q96RK0	1294	....P.SP.....
Q9Y4B5-263	Q9Y4B5	263	....P.SP.....
Q9Y217-561	Q9Y217	561	....P.SP.....
P07199-156	P07199	156	....P.SP.....
Q96JY6-197	Q96JY6	197	....P.SP.....
Q99567-50	Q99567	50	....P.SP.....
Q96TA1-696	Q96TA1	696	....P.SP.....
Q9ULM3-447	Q9ULM3	447	....P.SP.....
Q9NP66-105	Q9NP66	105	....P.SP.....
P48634-1219	P48634	1219	....P.SP.....
Q63HR2-835	Q63HR2	835	....P.SP.....
Q8TF72-913	Q8TF72	913	....P.SP.....
Q9Y2H5-848	Q9Y2H5	848	....P.SP.....
P0C1Z6-180	P0C1Z6	180	....P.SP.....
Q6IAA8-27	Q6IAA8	27	....P.SP.....
Q68CZ2-1154	Q68CZ2	1154	....P.SP.....
Q9H330-325	Q9H330	325	....P.SP.....
Q9H4A3-2032	Q9H4A3	2032	....P.SP.....
Q96LL9-137	Q96LL9	137	....P.SP.....
A6ND36-760	A6ND36	760	....P.SP.....
Q16584-758	Q16584	758	....P.SP.....
Q6WCQ1-289	Q6WCQ1	289	....P.SP.....
Q96MH2-29	Q96MH2	29	....P.SP.....
O75398-176	O75398	176	....P.SP.....
Q9UQ35-2046	Q9UQ35	2046	...R..SP.....
Q13595-100	Q13595	100	...R..SP.....
Q14004-317	Q14004	317	...R..SP.....
Q9Y2W1-55	Q9Y2W1	55	...R..SP.....
P43243-598	P43243	598	...R..SP.....
Q13523-580	Q13523	580	...R..SP.....
Q9P2F8-1652	Q9P2F8	1652	...R..SP.....
Q8IYB3-292	Q8IYB3	292	...R..SP.....
Q8TC71-509	Q8TC71	509	...R..SP.....
Q8WZ42-33203	Q8WZ42	33203	...R..SP.....
Q13595-262	Q13595	262	...R..SP.....
Q14739-86	Q14739	86	...R..SP.....
Q7Z4H7-908	Q7Z4H7	908	...R..SP.....
Q9UMN6-1917	Q9UMN6	1917	...R..SP.....
Q9Y2V2-32	Q9Y2V2	32	...R..SP.....
Q14687-828	Q14687	828	...R..SP.....
Q96T58-727	Q96T58	727	...R..SP.....
P49585-331	P49585	331	...R..SP.....
Q9UQ35-1103	Q9UQ35	1103	...R..SP.....
Q92466-26	Q92466	26	...R..SP.....
Q96T37-259	Q96T37	259	...R..SP.....
Q14241-151	Q14241	151	...R..SP.....
Q92615-601	Q92615	601	...R..SP.....
Q13523-368	Q13523	368	...R..SP.....
Q9UQ35-954	Q9UQ35	954	...R..SP.....
Q6ZSR9-294	Q6ZSR9	294	...R..SP.....
Q01130-208	Q01130	208	...R..SP.....
Q9NWB6-77	Q9NWB6	77	...R..SP.....
Q9H4G0-784	Q9H4G0	784	...R..SP.....
Q9ULD4-19	Q9ULD4	19	...R..SP.....
Q99607-188	Q99607	188	...R..SP.....
Q8TE67-231	Q8TE67	231	...R..SP.....
Q9NYV4-325	Q9NYV4	325	...R..SP.....
Q13586-618	Q13586	618	...R..SP.....
P18031-50	P18031	50	...R..SP.....
Q9HBL0-794	Q9HBL0	794	...R..SP.....
Q9NYV4-334	Q9NYV4	334	...R..SP.....
Q66K74-640	Q66K74	640	...R..SP.....
P08581-990	P08581	990	...R..SP.....
Q8IYB3-310	Q8IYB3	310	...R..SP.....
Q6NYC8-125	Q6NYC8	125	...R..SP.....
Q14865-1032	Q14865	1032	...R..SP.....
Q9UKJ3-1035	Q9UKJ3	1035	...R..SP.....
Q5THJ4-1042	Q5THJ4	1042	...R..SP.....
Q9P1Y6-1034	Q9P1Y6	1034	...R..SP.....
Q9P266-757	Q9P266	757	...R..SP.....
Q9NRA8-951	Q9NRA8	951	...R..SP.....
Q8IYB3-597	Q8IYB3	597	...R..SP.....
Q8NFG4-62	Q8NFG4	62	...R..SP.....
O94929-373	O94929	373	...R..SP.....
Q9P1Y5-1074	Q9P1Y5	1074	...R..SP.....
Q99590-796	Q99590	796	...R..SP.....
Q9UQ35-510	Q9UQ35	510	...R..SP.....
Q9UKA4-1242	Q9UKA4	1242	...R..SP.....
Q8NDX6-44	Q8NDX6	44	...R..SP.....
Q659C4-340	Q659C4	340	...R..SP.....
Q9UDY2-266	Q9UDY2	266	...R..SP.....
Q08999-966	Q08999	966	...R..SP.....
Q14669-312	Q14669	312	...R..SP.....
Q9NS56-585	Q9NS56	585	...R..SP.....
Q12802-1559	Q12802	1559	...R..SP.....
Q03989-463	Q03989	463	...R..SP.....
Q9Y2K6-373	Q9Y2K6	373	...R..SP.....
Q86SQ0-73	Q86SQ0	73	...R..SP.....
Q9UDY2-415	Q9UDY2	415	...R..SP.....
Q9UQ35-536	Q9UQ35	536	...R..SP.....
Q9NRY4-975	Q9NRY4	975	...R..SP.....
Q8N2M8-294	Q8N2M8	294	...R..SP.....
Q9BRD0-271	Q9BRD0	271	...R..SP.....
Q8TF01-211	Q8TF01	211	...R..SP.....
Q16204-419	Q16204	419	...R..SP.....
Q8NDT2-267	Q8NDT2	267	...R..SP.....
Q9C0B5-529	Q9C0B5	529	...R..SP.....
Q8NCN4-403	Q8NCN4	403	...R..SP.....
Q9P1Y6-936	Q9P1Y6	936	...R..SP.....
Q6UB98-149	Q6UB98	149	...R..SP.....
Q96JH7-998	Q96JH7	998	...R..SP.....
Q9UJX2-588	Q9UJX2	588	...R..SP.....
O75170-771	O75170	771	...R..SP.....
Q8WWI1-1593	Q8WWI1	1593	...R..SP.....
Q5T200-877	Q5T200	877	...R..SP.....
Q9NYL2-637	Q9NYL2	637	...R..SP.....
Q96MU7-308	Q96MU7	308	...R..SP.....
P54259-645	P54259	645	...R..SP.....
Q8IZD4-283	Q8IZD4	283	...R..SP.....
Q8N1G1-459	Q8N1G1	459	...R..SP.....
Q13523-277	Q13523	277	...R..SP.....
Q96JM3-476	Q96JM3	476	...R..SP.....
Q14498-97	Q14498	97	...R..SP.....
Q86VQ6-32	Q86VQ6	32	...R..SP.....
Q96JY6-134	Q96JY6	134	...R..SP.....
Q16629-159	Q16629	159	...R..SP.....
Q1MSJ5-920	Q1MSJ5	920	...R..SP.....
Q8NCN2-463	Q8NCN2	463	...R..SP.....
Q9ULM3-124	Q9ULM3	124	...R..SP.....
Q96JH7-747	Q96JH7	747	...R..SP.....
Q9BY89-128	Q9BY89	128	...R..SP.....
Q9P2B4-488	Q9P2B4	488	...R..SP.....
P31948-481	P31948	481	...R..SP.....
Q13443-758	Q13443	758	...R..SP.....
Q99569-314	Q99569	314	...R..SP.....
Q15911-3432	Q15911	3432	...R..SP.....
Q0VG06-667	Q0VG06	667	...R..SP.....
Q9NP87-12	Q9NP87	12	...R..SP.....
O14686-4738	O14686	4738	...R..SP.....
A1L170-223	A1L170	223	...R..SP.....
Q9BSJ8-1034	Q9BSJ8	1034	...R..SP.....
P28066-56	P28066	56	...R..SP.....
O95402-447	O95402	447	...R..SP.....
O14828-76	O14828	76	...R..SP.....
Q9UQ35-297	Q9UQ35	297	...R..SP.....
Q14004-325	Q14004	325	...R..SP.....
Q8TC07-675	Q8TC07	675	...R..SP.....
Q8TEW8-1184	Q8TEW8	1184	...R..SP.....
P48728-334	P48728	334	...R..SP.....
Q9BRZ2-475	Q9BRZ2	475	...R..SP.....
Q9BX66-556	Q9BX66	556	...R..SP.....
Q8N2M8-285	Q8N2M8	285	...R..SP.....
O00159-864	O00159	864	...R..SP.....
Q5C9Z4-139	Q5C9Z4	139	...R..SP.....
Q5VUA4-2101	Q5VUA4	2101	...R..SP.....
Q86TB9-179	Q86TB9	179	...R..SP.....
Q6UXY1-231	Q6UXY1	231	...R..SP.....
Q8NEY8-205	Q8NEY8	205	...R..SP.....
Q9NYF8-531	Q9NYF8	531	...R..SP.....
P33241-177	P33241	177	...R..SP.....
Q6UN15-304	Q6UN15	304	...R..SP.....
Q9NYF8-648	Q9NYF8	648	...R..SP.....
Q96EN8-530	Q96EN8	530	...R..SP.....
Q8IYB3-389	Q8IYB3	389	...R..SP.....
Q07157-912	Q07157	912	...R..SP.....
Q9UGU0-1005	Q9UGU0	1005	...R..SP.....
Q9UHB6-132	Q9UHB6	132	...R..SP.....
Q14526-237	Q14526	237	...R..SP.....
Q86WR7-179	Q86WR7	179	...R..SP.....
Q86U06-149	Q86U06	149	...R..SP.....
Q5VUA4-136	Q5VUA4	136	...R..SP.....
Q9UQ35-2132	Q9UQ35	2132	...R..SP.....
Q13029-643	Q13029	643	...R..SP.....
Q14677-227	Q14677	227	...R..SP.....
Q9UPX8-1330	Q9UPX8	1330	...R..SP.....
Q96T58-847	Q96T58	847	...R..SP.....
Q9NRA8-564	Q9NRA8	564	...R..SP.....
Q9P1Y6-1124	Q9P1Y6	1124	...R..SP.....
Q96FF7-91	Q96FF7	91	...R..SP.....
O00267-671	O00267	671	...R..SP.....
Q9Y2F5-1692	Q9Y2F5	1692	...R..SP.....
P21980-216	P21980	216	...R..SP.....
Q9UKK3-1335	Q9UKK3	1335	...R..SP.....
P50402-49	P50402	49	...R..SP.....
Q9Y4B5-306	Q9Y4B5	306	...R..SP.....
P41212-184	P41212	184	...R..SP.....
Q9H6Z4-333	Q9H6Z4	333	...R..SP.....
P49590-67	P49590	67	...R..SP.....
Q6GYQ0-861	Q6GYQ0	861	...R..SP.....
Q5VSL9-335	Q5VSL9	335	...R..SP.....
Q8NAP3-309	Q8NAP3	309	...R..SP.....
O43491-499	O43491	499	...R..SP.....
Q9NX40-123	Q9NX40	123	...R..SP.....
O95049-378	O95049	378	...R..SP.....
Q13144-544	Q13144	544	...R..SP.....
O95817-173	O95817	173	...R..SP.....
Q8NEZ4-836	Q8NEZ4	836	...R..SP.....
Q6ZRV2-892	Q6ZRV2	892	...R..SP.....
Q9HCD5-29	Q9HCD5	29	...R..SP.....
Q7RTP6-1310	Q7RTP6	1310	...R..SP.....
Q6H8Q1-364	Q6H8Q1	364	...R..SP.....
P13807-653	P13807	653	...R..SP.....
Q13796-1036	Q13796	1036	...R..SP.....
Q96RL1-653	Q96RL1	653	...R..SP.....
Q13426-328	Q13426	328	...R..SP.....
A1L390-1028	A1L390	1028	...R..SP.....
Q14978-623	Q14978	623	...R..SP.....
O96019-233	O96019	233	...R..SP.....
Q15287-251	Q15287	251	...R..SP.....
O00193-17	O00193	17	...R..SP.....
Q96PK6-215	Q96PK6	215	...R..SP.....
Q9BYB0-1577	Q9BYB0	1577	...R..SP.....
Q96JE7-143	Q96JE7	143	...R..SP.....
Q15788-22	Q15788	22	...R..SP.....
Q12986-150	Q12986	150	...R..SP.....
Q6IQ23-536	Q6IQ23	536	...R..SP.....
P57682-92	P57682	92	...R..SP.....
Q13427-687	Q13427	687	...R..SP.....
Q9BTE3-298	Q9BTE3	298	...R..SP.....
Q13523-387	Q13523	387	...R..SP.....
Q6PJG2-923	Q6PJG2	923	...R..SP.....
Q9BTC0-1714	Q9BTC0	1714	...R..SP.....
O95819-639	O95819	639	...R..SP.....
Q96T37-294	Q96T37	294	...R..SP.....
Q13796-779	Q13796	779	...R..SP.....
O15231-453	O15231	453	...R..SP.....
Q53EP0-208	Q53EP0	208	...R..SP.....
Q5T200-1208	Q5T200	1208	...R..SP.....
Q96A00-128	Q96A00	128	...R..SP.....
P51948-279	P51948	279	...R..SP.....
Q9BYW2-532	Q9BYW2	532	...R..SP.....
Q15013-102	Q15013	102	...R..SP.....
Q8N3V7-754	Q8N3V7	754	...R..SP.....
Q9NTI5-1358	Q9NTI5	1358	...R..SP.....
Q15746-305	Q15746	305	...R..SP.....
Q8TDJ6-473	Q8TDJ6	473	...R..SP.....
Q96B97-587	Q96B97	587	...R..SP.....
O15061-429	O15061	429	...R..SP.....
Q86XL3-662	Q86XL3	662	...R..SP.....
Q53ET0-116	Q53ET0	116	...R..SP.....
Q8WXX7-941	Q8WXX7	941	...R..SP.....
Q9NZM3-884	Q9NZM3	884	...R..SP.....
Q9BV73-2229	Q9BV73	2229	...R..SP.....
Q96JM3-459	Q96JM3	459	...R..SP.....
O75382-437	O75382	437	...R..SP.....
Q9Y2W1-248	Q9Y2W1	248	...R..SP.....
Q8TED9-745	Q8TED9	745	...R..SP.....
P41212-213	P41212	213	...R..SP.....
Q96JN8-502	Q96JN8	502	...R..SP.....
Q9UQB3-267	Q9UQB3	267	...R..SP.....
Q16643-142	Q16643	142	...R..SP.....
Q13796-974	Q13796	974	...R..SP.....
Q14865-1002	Q14865	1002	...R..SP.....
P20823-247	P20823	247	...R..SP.....
Q8IYB3-628	Q8IYB3	628	......SP...R.
Q8IYB3-607	Q8IYB3	607	......SP...R.
Q13523-241	Q13523	241	......SP...R.
Q5VUA4-81	Q5VUA4	81	......SP...R.
Q8IWX8-806	Q8IWX8	806	......SP...R.
Q9UQ35-2694	Q9UQ35	2694	......SP...R.
O94964-1017	O94964	1017	......SP...R.
P02545-392	P02545	392	......SP...R.
Q9NYF8-153	Q9NYF8	153	......SP...R.
Q8NDI1-436	Q8NDI1	436	......SP...R.
O95359-2226	O95359	2226	......SP...R.
Q7Z6B7-932	Q7Z6B7	932	......SP...R.
O95819-631	O95819	631	......SP...R.
Q7Z4S6-1239	Q7Z4S6	1239	......SP...R.
O94929-388	O94929	388	......SP...R.
Q8IXT5-575	Q8IXT5	575	......SP...R.
P11498-142	P11498	142	......SP...R.
P49585-323	P49585	323	......SP...R.
Q8IYB3-740	Q8IYB3	740	......SP...R.
Q9H330-332	Q9H330	332	......SP...R.
P18583-2013	P18583	2013	......SP...R.
Q9Y4B5-1514	Q9Y4B5	1514	......SP...R.
A6NDB9-420	A6NDB9	420	......SP...R.
Q9BXB4-181	Q9BXB4	181	......SP...R.
Q15678-314	Q15678	314	......SP...R.
Q03001-1382	Q03001	1382	......SP...R.
P62750-43	P62750	43	......SP...R.
Q01082-2169	Q01082	2169	......SP...R.
Q9UQ35-2071	Q9UQ35	2071	......SP...R.
Q9Y6R9-336	Q9Y6R9	336	......SP...R.
Q8NFC6-3019	Q8NFC6	3019	......SP...R.
Q9NYV4-345	Q9NYV4	345	......SP...R.
Q13523-437	Q13523	437	......SP...R.
Q9Y2W1-682	Q9Y2W1	682	......SP...R.
Q5JTV8-143	Q5JTV8	143	......SP...R.
P52594-181	P52594	181	......SP...R.
Q5T200-198	Q5T200	198	......SP...R.
P62995-99	P62995	99	......SP...R.
Q16584-507	Q16584	507	......SP...R.
Q8IYB3-393	Q8IYB3	393	......SP...R.
Q9Y2W1-672	Q9Y2W1	672	......SP...R.
Q92835-1039	Q92835	1039	......SP...R.
Q9UKV3-657	Q9UKV3	657	......SP...R.
P25054-2449	P25054	2449	......SP...R.
Q9NR19-267	Q9NR19	267	......SP...R.
Q9UQ35-2740	Q9UQ35	2740	......SP...R.
Q96T37-700	Q96T37	700	......SP...R.
O60256-227	O60256	227	......SP...R.
Q7L9B9-110	Q7L9B9	110	......SP...R.
P18615-181	P18615	181	......SP...R.
P50479-112	P50479	112	......SP...R.
P18583-1076	P18583	1076	......SP...R.
P18887-241	P18887	241	......SP...R.
Q9Y3T9-56	Q9Y3T9	56	......SP...R.
Q86VM9-534	Q86VM9	534	......SP...R.
Q9UQ35-351	Q9UQ35	351	......SP...R.
P51608-80	P51608	80	......SP...R.
Q13541-101	Q13541	101	......SP...R.
Q9P2N5-120	Q9P2N5	120	......SP...R.
Q9UDY2-174	Q9UDY2	174	......SP...R.
Q8IYB3-696	Q8IYB3	696	......SP...R.
Q07955-238	Q07955	238	......SP...R.
Q7KZI7-486	Q7KZI7	486	......SP...R.
P08621-226	P08621	226	......SP...R.
Q9BXP5-74	Q9BXP5	74	......SP...R.
O14686-1606	O14686	1606	......SP...R.
Q8TAQ2-283	Q8TAQ2	283	......SP...R.
Q9NYF8-658	Q9NYF8	658	......SP...R.
P36578-295	P36578	295	......SP...R.
Q13191-484	Q13191	484	......SP...R.
Q9Y2V2-41	Q9Y2V2	41	......SP...R.
Q16629-192	Q16629	192	......SP...R.
Q9UQ35-1132	Q9UQ35	1132	......SP...R.
Q9P2G1-737	Q9P2G1	737	......SP...R.
Q9BRD0-214	Q9BRD0	214	......SP...R.
Q6ZU65-13	Q6ZU65	13	......SP...R.
O94929-379	O94929	379	......SP...R.
Q8WUA4-901	Q8WUA4	901	......SP...R.
Q16584-524	Q16584	524	......SP...R.
O00337-43	O00337	43	......SP...R.
Q13523-294	Q13523	294	......SP...R.
Q96T37-656	Q96T37	656	......SP...R.
Q8IUD2-21	Q8IUD2	21	......SP...R.
Q9NWK9-25	Q9NWK9	25	......SP...R.
Q9Y283-614	Q9Y283	614	......SP...R.
Q9BRD0-391	Q9BRD0	391	......SP...R.
O94913-705	O94913	705	......SP...R.
Q9UHR4-261	Q9UHR4	261	......SP...R.
O60504-348	O60504	348	......SP...R.
Q9HAN9-117	Q9HAN9	117	......SP...R.
Q14160-835	Q14160	835	......SP...R.
A7KAX9-892	A7KAX9	892	......SP...R.
P52756-59	P52756	59	......SP...R.
Q8IX03-899	Q8IX03	899	......SP...R.
Q8TER5-961	Q8TER5	961	......SP...R.
P78332-1025	P78332	1025	......SP...R.
P46379-964	P46379	964	......SP...R.
Q9NRG9-495	Q9NRG9	495	......SP...R.
Q9BRJ6-59	Q9BRJ6	59	......SP...R.
Q8N3V7-525	Q8N3V7	525	......SP...R.
Q96HC4-332	Q96HC4	332	......SP...R.
Q13242-204	Q13242	204	......SP...R.
O14545-415	O14545	415	......SP...R.
Q9NYL2-727	Q9NYL2	727	......SP...R.
Q8WYQ5-95	Q8WYQ5	95	......SP...R.
Q9UDT6-923	Q9UDT6	923	......SP...R.
Q5T200-325	Q5T200	325	......SP...R.
Q9UKE5-680	Q9UKE5	680	......SP...R.
P57682-250	P57682	250	......SP...R.
Q9Y4G8-1022	Q9Y4G8	1022	......SP...R.
Q9Y4F1-427	Q9Y4F1	427	......SP...R.
Q01130-26	Q01130	26	......SP...R.
Q13425-110	Q13425	110	......SP...R.
Q01664-124	Q01664	124	......SP...R.
Q8IVL1-1488	Q8IVL1	1488	......SP...R.
Q96FV9-560	Q96FV9	560	......SP...R.
Q99700-624	Q99700	624	......SP...R.
Q9NXH8-63	Q9NXH8	63	......SP...R.
P21333-1459	P21333	1459	......SP...R.
Q14157-416	Q14157	416	......SP...R.
Q12888-366	Q12888	366	......SP...R.
O94811-160	O94811	160	......SP...R.
Q96T23-473	Q96T23	473	......SP...R.
Q5XPI4-675	Q5XPI4	675	......SP...R.
Q9UPQ0-973	Q9UPQ0	973	......SP...R.
Q5VT52-769	Q5VT52	769	......SP...R.
Q8IY33-143	Q8IY33	143	......SP...R.
Q9H0K1-576	Q9H0K1	576	......SP...R.
Q92598-809	Q92598	809	......SP...R.
Q92522-31	Q92522	31	......SP...R.
Q9BXP5-493	Q9BXP5	493	......SP...R.
Q9C073-207	Q9C073	207	......SP...R.
Q14966-552	Q14966	552	......SP...R.
P46821-1785	P46821	1785	......SP...R.
O60583-549	O60583	549	......SP...R.
O15417-1540	O15417	1540	......SP...R.
Q96HC4-360	Q96HC4	360	......SP...R.
O75674-323	O75674	323	......SP...R.
Q8WUB8-270	Q8WUB8	270	......SP...R.
Q9UKV3-386	Q9UKV3	386	......SP...R.
Q6IQ23-612	Q6IQ23	612	......SP...R.
Q7Z5L9-175	Q7Z5L9	175	......SP...R.
Q13470-519	Q13470	519	......SP...R.
Q96L91-736	Q96L91	736	......SP...R.
Q8ND56-216	Q8ND56	216	......SP...R.
Q8N3X1-18	Q8N3X1	18	......SP...R.
Q9HBL0-1124	Q9HBL0	1124	......SP...R.
Q9UKJ3-740	Q9UKJ3	740	......SP...R.
Q86X29-464	Q86X29	464	......SP...R.
Q9H3Q1-292	Q9H3Q1	292	......SP...R.
Q9C004-125	Q9C004	125	......SP...R.
P29590-505	P29590	505	......SP...R.
O95817-289	O95817	289	......SP...R.
Q96CV9-198	Q96CV9	198	......SP...R.
P22570-317	P22570	317	......SP...R.
Q53LP3-213	Q53LP3	213	......SP...R.
P11388-1213	P11388	1213	......SP...R.
Q9UQ35-1329	Q9UQ35	1329	......SP...R.
Q9C0C2-228	Q9C0C2	228	......SP...R.
Q9Y2F5-533	Q9Y2F5	533	......SP...R.
O94804-438	O94804	438	......SP...R.
Q6PJI9-822	Q6PJI9	822	......SP...R.
Q8WVM8-303	Q8WVM8	303	......SP...R.
Q96S66-438	Q96S66	438	......SP...R.
P42685-37	P42685	37	......SP...R.
Q15036-336	Q15036	336	......SP...R.
Q5JSH3-96	Q5JSH3	96	......SP...R.
Q8TER5-262	Q8TER5	262	......SP...R.
P05412-73	P05412	73	......SP...R.
P46821-2072	P46821	2072	......SP...R.
Q9Y3X0-80	Q9Y3X0	80	......SP...R.
Q9Y6D5-227	Q9Y6D5	227	......SP...R.
Q5T5P2-1568	Q5T5P2	1568	......SP....K
O43719-498	O43719	498	......SP....K
Q8WUM9-269	Q8WUM9	269	......SP....K
Q5JSZ5-613	Q5JSZ5	613	......SP....K
Q9NWH9-289	Q9NWH9	289	......SP....K
Q9BY89-749	Q9BY89	749	......SP....K
Q8TB45-265	Q8TB45	265	......SP....K
Q8IXM2-96	Q8IXM2	96	......SP....K
Q12906-382	Q12906	382	......SP....K
P18858-76	P18858	76	......SP....K
Q15942-259	Q15942	259	......SP....K
P78312-1144	P78312	1144	......SP....K
O15027-1905	O15027	1905	......SP....K
Q15149-1435	Q15149	1435	......SP....K
Q9NTI5-1283	Q9NTI5	1283	......SP....K
Q14155-676	Q14155	676	......SP....K
P41229-301	P41229	301	......SP....K
Q8NC51-234	Q8NC51	234	......SP....K
O00512-278	O00512	278	......SP....K
Q96SK2-147	Q96SK2	147	......SP....K
Q5THJ4-2079	Q5THJ4	2079	......SP....K
Q5TGY3-1403	Q5TGY3	1403	......SP....K
Q9Y2X3-514	Q9Y2X3	514	......SP....K
Q9Y597-711	Q9Y597	711	......SP....K
P49792-788	P49792	788	......SP....K
Q86YS7-260	Q86YS7	260	......SP....K
Q68CZ2-660	Q68CZ2	660	......SP....K
Q9UQ35-1083	Q9UQ35	1083	......SP....K
Q13523-93	Q13523	93	......SP....K
Q8IYB3-756	Q8IYB3	756	......SP....K
P55265-825	P55265	825	......SP....K
Q9UQ35-1014	Q9UQ35	1014	......SP....K
Q92610-368	Q92610	368	......SP....K
Q14562-460	Q14562	460	......SP....K
O75909-340	O75909	340	......SP....K
Q03111-292	Q03111	292	......SP....K
Q6PJI9-603	Q6PJI9	603	......SP....K
Q9H792-1036	Q9H792	1036	......SP....K
Q3B726-328	Q3B726	328	......SP....K
O76039-306	O76039	306	......SP....K
O43237-407	O43237	407	......SP....K
Q8N2M8-547	Q8N2M8	547	......SP....K
Q9UQ35-783	Q9UQ35	783	......SP....K
Q13522-67	Q13522	67	......SP....K
Q68E01-502	Q68E01	502	......SP....K
Q09666-177	Q09666	177	......SP....K
Q68DQ2-1280	Q68DQ2	1280	......SP....K
Q8IYB3-450	Q8IYB3	450	......SP....K
Q8N1G0-271	Q8N1G0	271	......SP....K
Q9UQ35-1732	Q9UQ35	1732	......SP....K
Q6NWY9-832	Q6NWY9	832	......SP....K
Q9BQG0-1241	Q9BQG0	1241	......SP....K
Q5T5U3-1503	Q5T5U3	1503	......SP....K
Q9UQ35-994	Q9UQ35	994	......SP....K
Q8TD16-582	Q8TD16	582	......SP....K
Q15057-521	Q15057	521	......SP....K
Q9P1Y6-814	Q9P1Y6	814	......SP....K
Q8TEH3-473	Q8TEH3	473	......SP....K
A6NFI3-112	A6NFI3	112	......SP....K
Q9BXK5-426	Q9BXK5	426	......SP....K
Q9H501-153	Q9H501	153	......SP....K
Q9UQ35-876	Q9UQ35	876	......SP....K
Q9Y490-2162	Q9Y490	2162	......SP....K
P46821-832	P46821	832	......SP....K
Q86YV5-782	Q86YV5	782	......SP....K
O95758-454	O95758	454	......SP....K
Q96HA9-164	Q96HA9	164	......SP....K
Q86UE4-568	Q86UE4	568	......SP....K
Q5JSH3-50	Q5JSH3	50	......SP....K
Q14966-605	Q14966	605	......SP....K
Q9HBL0-1446	Q9HBL0	1446	......SP....K
Q3KR37-274	Q3KR37	274	......SP....K
Q96BY7-255	Q96BY7	255	......SP....K
Q9UHI6-714	Q9UHI6	714	......SP....K
Q03111-475	Q03111	475	......SP....K
Q01105-7	Q01105	7	......SP....K
Q8N1I0-1700	Q8N1I0	1700	......SP....K
Q92667-445	Q92667	445	......SP....K
Q9H6F5-58	Q9H6F5	58	......SP....K
P26368-79	P26368	79	......SP....K
Q5VZ89-505	Q5VZ89	505	......SP....K
O94956-320	O94956	320	......SP....K
Q86UE4-308	Q86UE4	308	......SP....K
Q6KC79-318	Q6KC79	318	......SP....K
Q8IYB3-653	Q8IYB3	653	......SP....K
Q6UN15-259	Q6UN15	259	......SP....K
Q9UK58-445	Q9UK58	445	......SP....K
Q9UPU5-2047	Q9UPU5	2047	......SP....K
Q13045-856	Q13045	856	......SP....K
O15027-891	O15027	891	......SP....K
Q6W2J9-423	Q6W2J9	423	......SP....K
P21796-104	P21796	104	......SP....K
Q92615-718	Q92615	718	......SP....K
Q9BW91-121	Q9BW91	121	......SP....K
Q5JTC6-246	Q5JTC6	246	......SP....K
Q6WCQ1-891	Q6WCQ1	891	......SP....K
P18206-346	P18206	346	......SP....K
Q6NZY4-649	Q6NZY4	649	......SP....K
Q9BWF3-86	Q9BWF3	86	......SP....K
Q96K21-144	Q96K21	144	......SP....K
Q02880-1180	Q02880	1180	......SP....K
Q92614-2007	Q92614	2007	......SP....K
Q96A00-26	Q96A00	26	......SP....K
Q8IVL1-481	Q8IVL1	481	......SP....K
Q9H4M7-575	Q9H4M7	575	......SP....K
Q9UPN6-617	Q9UPN6	617	......SP....K
Q15596-699	Q15596	699	......SP....K
Q12986-326	Q12986	326	......SP....K
Q9H270-813	Q9H270	813	......SP....K
P49327-207	P49327	207	......SP....K
Q9UNZ2-140	Q9UNZ2	140	......SP....K
Q9UQ35-1387	Q9UQ35	1387	......SP....K
P40306-230	P40306	230	......SP....K
Q14669-1427	Q14669	1427	......SP....K
Q9BZE9-275	Q9BZE9	275	......SP....K
Q9Y6M7-84	Q9Y6M7	84	....R.SP.....
Q9UKM9-135	Q9UKM9	135	....R.SP.....
Q8IXT5-710	Q8IXT5	710	....R.SP.....
Q9ULD4-17	Q9ULD4	17	....R.SP.....
P49815-1411	P49815	1411	....R.SP.....
Q86VM9-842	Q86VM9	842	....R.SP.....
Q5JSH3-561	Q5JSH3	561	....R.SP.....
Q9P206-862	Q9P206	862	....R.SP.....
P30291-165	P30291	165	....R.SP.....
Q8WWM7-339	Q8WWM7	339	....R.SP.....
Q14558-215	Q14558	215	....R.SP.....
Q5VUA4-1243	Q5VUA4	1243	....R.SP.....
Q86VE0-202	Q86VE0	202	....R.SP.....
Q8IYB3-683	Q8IYB3	683	....R.SP.....
Q8IXT5-638	Q8IXT5	638	....R.SP.....
Q15287-155	Q15287	155	....R.SP.....
Q13469-236	Q13469	236	....R.SP.....
Q9H147-161	Q9H147	161	....R.SP.....
P11274-354	P11274	354	....R.SP.....
Q6F5E8-991	Q6F5E8	991	....R.SP.....
Q96G74-64	Q96G74	64	....R.SP.....
P49716-191	P49716	191	....R.SP.....
Q9BXP5-67	Q9BXP5	67	....R.SP.....
Q92974-956	Q92974	956	....R.SP.....
Q8IXT5-718	Q8IXT5	718	....R.SP.....
Q96Q42-1335	Q96Q42	1335	....R.SP.....
O15119-456	O15119	456	....R.SP.....
Q96JE7-55	Q96JE7	55	....R.SP.....
O15055-977	O15055	977	....R.SP.....
Q9P206-404	Q9P206	404	....R.SP.....
Q8TAD8-35	Q8TAD8	35	....R.SP.....
Q6PKG0-75	Q6PKG0	75	....R.SP.....
Q8IYB3-402	Q8IYB3	402	....R.SP.....
Q9HCK8-2046	Q9HCK8	2046	....R.SP.....
Q6NWY9-764	Q6NWY9	764	....R.SP.....
Q9HC35-144	Q9HC35	144	....R.SP.....
Q9UIF9-1770	Q9UIF9	1770	....R.SP.....
Q9C0C9-115	Q9C0C9	115	....R.SP.....
Q6IN85-741	Q6IN85	741	....R.SP.....
Q5T0N5-501	Q5T0N5	501	....R.SP.....
Q96PK6-582	Q96PK6	582	....R.SP.....
Q7L2J0-69	Q7L2J0	69	....R.SP.....
O94826-91	O94826	91	....R.SP.....
P02545-390	P02545	390	....R.SP.....
Q14160-1566	Q14160	1566	....R.SP.....
O76080-48	O76080	48	....R.SP.....
Q8N612-582	Q8N612	582	....R.SP.....
Q9UQ35-1857	Q9UQ35	1857	....R.SP.....
Q9C0C2-672	Q9C0C2	672	....R.SP.....
Q8TB36-11	Q8TB36	11	....R.SP.....
Q16514-51	Q16514	51	....R.SP.....
P41208-20	P41208	20	....R.SP.....
Q9BY89-1224	Q9BY89	1224	....R.SP.....
P27816-384	P27816	384	....R.SP.....
P27816-358	P27816	358	....R.SP.....
Q07955-234	Q07955	234	....R.SP.....
Q92738-396	Q92738	396	....R.SP.....
Q69YN4-138	Q69YN4	138	....R.SP.....
Q9HCD5-34	Q9HCD5	34	....R.SP.....
Q0JRZ9-394	Q0JRZ9	394	....R.SP.....
Q9NYB9-196	Q9NYB9	196	....R.SP.....
P15408-200	P15408	200	....R.SP.....
Q9Y2W1-268	Q9Y2W1	268	....R.SP.....
Q9Y5B0-395	Q9Y5B0	395	....R.SP.....
P00918-29	P00918	29	....R.SP.....
P98175-89	P98175	89	....R.SP.....
Q96C24-74	Q96C24	74	....R.SP.....
Q8N3V7-685	Q8N3V7	685	....R.SP.....
Q9Y426-435	Q9Y426	435	....R.SP.....
O15085-255	O15085	255	....R.SP.....
Q96T23-604	Q96T23	604	....R.SP.....
Q9ULP9-480	Q9ULP9	480	....R.SP.....
Q8WY36-844	Q8WY36	844	....R.SP.....
Q15596-493	Q15596	493	....R.SP.....
Q7Z591-935	Q7Z591	935	....R.SP.....
P48681-1577	P48681	1577	....R.SP.....
Q9Y2L9-370	Q9Y2L9	370	....R.SP.....
Q13242-211	Q13242	211	....R.SP.....
A6NEL2-271	A6NEL2	271	....R.SP.....
Q9BTE3-154	Q9BTE3	154	....R.SP.....
P28290-767	P28290	767	....R.SP.....
Q9NYF8-285	Q9NYF8	285	....R.SP.....
Q14195-522	Q14195	522	....R.SP.....
Q8IYB3-414	Q8IYB3	414	....R.SP.....
Q5JTD0-300	Q5JTD0	300	....R.SP.....
Q9UJM3-273	Q9UJM3	273	....R.SP.....
Q8ND56-183	Q8ND56	183	....R.SP.....
Q13427-290	Q13427	290	....R.SP.....
Q13541-65	Q13541	65	....R.SP.....
O15119-438	O15119	438	....R.SP.....
Q9Y618-1349	Q9Y618	1349	....R.SP.....
Q9BUH6-152	Q9BUH6	152	....R.SP.....
Q9NYZ3-580	Q9NYZ3	580	....R.SP.....
Q9Y4E6-935	Q9Y4E6	935	....R.SP.....
Q9UKV3-729	Q9UKV3	729	....R.SP.....
O95297-219	O95297	219	....R.SP.....
P11277-2114	P11277	2114	....R.SP.....
Q9Y2J4-236	Q9Y2J4	236	....R.SP.....
Q96JK2-648	Q96JK2	648	....R.SP.....
P55196-1173	P55196	1173	....R.SP.....
P98175-723	P98175	723	....R.SP.....
Q63HR2-941	Q63HR2	941	....R.SP.....
Q92786-511	Q92786	511	....R.SP.....
Q9BUR4-54	Q9BUR4	54	....R.SP.....
Q86TI0-614	Q86TI0	614	....R.SP.....
Q9Y6R9-334	Q9Y6R9	334	....R.SP.....
Q9BR39-469	Q9BR39	469	....R.SP.....
Q9HD20-899	Q9HD20	899	....R.SP.....
O75376-2102	O75376	2102	....R.SP.....
P18754-11	P18754	11	....R.SP.....
Q5T200-77	Q5T200	77	....R.SP.....
O75131-243	O75131	243	....R.SP.....
Q8IY92-584	Q8IY92	584	....R.SP.....
Q01196-212	Q01196	212	....R.SP.....
Q13469-856	Q13469	856	....R.SP.....
Q14667-2094	Q14667	2094	....R.SP.....
Q14160-1445	Q14160	1445	....R.SP.....
Q8NEY8-133	Q8NEY8	133	....R.SP.....
O43166-1255	O43166	1255	....R.SP.....
P17812-562	P17812	562	....R.SP.....
O00192-343	O00192	343	....R.SP.....
Q6ZU65-1123	Q6ZU65	1123	....R.SP.....
Q9NP71-602	Q9NP71	602	....R.SP.....
P46100-316	P46100	316	....R.SP.....
P19338-563	P19338	563	....R.SP.....
P14174-91	P14174	91	....R.SP.....
O95613-2352	O95613	2352	....R.SP.....
Q8IZL8-481	Q8IZL8	481	....R.SP.....
O94875-278	O94875	278	....R.SP.....
P08034-266	P08034	266	....R.SP.....
Q8N1I0-1631	Q8N1I0	1631	....R.SP.....
Q9NZN8-170	Q9NZN8	170	....R.SP.....
Q9H0D6-448	Q9H0D6	448	....R.SP.....
Q9UPW6-13	Q9UPW6	13	....R.SP.....
Q9NP71-631	Q9NP71	631	....R.SP.....
Q5JSZ5-853	Q5JSZ5	853	....R.SP.....
Q06413-222	Q06413	222	....R.SP.....
Q6ZVK1-220	Q6ZVK1	220	....R.SP.....
A1L390-741	A1L390	741	...RR.S......
Q8WWW8-344	Q8WWW8	344	...RR.S......
Q07002-130	Q07002	130	...RR.S......
Q9ULU4-425	Q9ULU4	425	...RR.S......
A0A087X1C5-135	A0A087X1C5	135	...RR.S......
Q00537-180	Q00537	180	...RR.S......
Q53GL7-925	Q53GL7	925	...RR.S......
Q9NYF3-232	Q9NYF3	232	...RR.S......
Q14004-315	Q14004	315	...RR.S......
P10632-127	P10632	127	...RR.S......
Q13501-24	Q13501	24	...RR.S......
Q9ULL8-299	Q9ULL8	299	...RR.S......
Q9H0K1-587	Q9H0K1	587	...RR.S......
P13612-1021	P13612	1021	...RR.S......
Q5VUA4-527	Q5VUA4	527	...RR.S......
Q9UKV3-561	Q9UKV3	561	...RR.S......
Q9HCG8-829	Q9HCG8	829	...RR.S......
Q8IYB3-636	Q8IYB3	636	...RR.S......
Q13286-12	Q13286	12	...RR.S......
Q16875-461	Q16875	461	...RR.S......
O75665-735	O75665	735	...RR.S......
O43847-94	O43847	94	...RR.S......
P48681-768	P48681	768	...RR.S......
Q5TBA9-2487	Q5TBA9	2487	...RR.S......
Q96D71-272	Q96D71	272	...RR.S......
Q13370-318	Q13370	318	...RR.S......
Q9H0D6-678	Q9H0D6	678	...RR.S......
P33261-127	P33261	127	...RR.S......
Q07002-12	Q07002	12	...RR.S......
P28799-435	P28799	435	...RR.S......
O60381-380	O60381	380	...RR.S......
Q5K4L6-139	Q5K4L6	139	...RR.S......
Q96T58-623	Q96T58	623	...RR.S......
A1L170-222	A1L170	222	...RR.S......
Q96T37-257	Q96T37	257	...RR.S......
Q8NB49-1108	Q8NB49	1108	...RR.S......
O95071-1549	O95071	1549	...RR.S......
P18583-1948	P18583	1948	...RR.S......
P09525-125	P09525	125	...RR.S......
Q14671-709	Q14671	709	...RR.S......
Q14432-312	Q14432	312	...RR.S......
Q92841-599	Q92841	599	...RR.S......
P12931-17	P12931	17	...RR.S......
O00763-91	O00763	91	...RR.S......
Q5T5Y3-629	Q5T5Y3	629	...RR.S......
Q8N4B1-213	Q8N4B1	213	...RR.S......
Q13459-1354	Q13459	1354	...RR.S......
Q07002-87	Q07002	87	...RR.S......
Q6PJT7-343	Q6PJT7	343	...RR.S......
Q9NSY1-1029	Q9NSY1	1029	...RR.S......
P78314-278	P78314	278	...RR.S......
Q8WZ42-33201	Q8WZ42	33201	...RR.S......
P78347-412	P78347	412	...RR.S......
Q9BST9-106	Q9BST9	106	...RR.S......
Q9C0C2-429	Q9C0C2	429	...RR.S......
O60825-466	O60825	466	...RR.S......
P62995-95	P62995	95	...RR.S......
O60293-352	O60293	352	...RR.S......
Q96S55-75	Q96S55	75	...RR.S......
Q6P6C2-361	Q6P6C2	361	...RR.S......
Q03393-19	Q03393	19	...RR.S......
Q9ULJ8-840	Q9ULJ8	840	...RR.S......
Q5HYI8-110	Q5HYI8	110	...RR.S......
Q14847-146	Q14847	146	...RR.S......
Q9BX95-112	Q9BX95	112	...RR.S......
Q9BRQ6-13	Q9BRQ6	13	...RR.S......
Q9NYV4-274	Q9NYV4	274	...RR.S......
P18583-2029	P18583	2029	...RR.S......
Q9HBL0-1393	Q9HBL0	1393	...RR.S......
Q8TB72-587	Q8TB72	587	...RR.S......
Q13946-84	Q13946	84	...RR.S......
Q8N370-274	Q8N370	274	...RR.S......
Q9BQF6-11	Q9BQF6	11	...RR.S......
Q02952-627	Q02952	627	...RR.S......
Q92934-118	Q92934	118	...RR.S......
P18583-2009	P18583	2009	...RR.S......
P20813-128	P20813	128	...RR.S......
Q96AX9-309	Q96AX9	309	...RR.S......
P54253-775	P54253	775	...RR.S......
P43243-188	P43243	188	...RR.S......
Q9H1B7-657	Q9H1B7	657	...RR.S......
Q13615-633	Q13615	633	...RR.S......
Q14934-289	Q14934	289	...RR.S......
P16452-248	P16452	248	...RR.S......
P11586-490	P11586	490	...RR.S......
Q9NQC3-181	Q9NQC3	181	...RR.S......
P49761-215	P49761	215	...RR.S......
P04049-43	P04049	43	...RR.S......
Q96PK6-618	Q96PK6	618	...RR.S......
Q00537-137	Q00537	137	...RR.S......
Q92794-941	Q92794	941	...RR.S......
Q9Y385-266	Q9Y385	266	...RR.S......
Q8N2U9-110	Q8N2U9	110	...RR.S......
Q969E1-71	Q969E1	71	...RR.S......
O14974-995	O14974	995	...RR.S......
O75970-1078	O75970	1078	...RR.S......
Q07352-54	Q07352	54	...RR.S......
Q8IYB3-725	Q8IYB3	725	...RR.S......
Q8WWA1-137	Q8WWA1	137	...RR.S......
O95049-203	O95049	203	...RR.S......
Q96KR1-1054	Q96KR1	1054	...RR.S......
Q9BZL6-197	Q9BZL6	197	...RR.S......
O94929-372	O94929	372	...RR.S......
Q6ZRV2-1003	Q6ZRV2	1003	...RR.S......
Q9NP64-114	Q9NP64	114	...RR.S......
Q9UIK4-299	Q9UIK4	299	...RR.S......
P26678-16	P26678	16	...RR.S......
Q7Z309-50	Q7Z309	50	...RR.S......
P31323-114	P31323	114	...RR.S......
P50548-489	P50548	489	...RR.S......
Q96EP0-466	Q96EP0	466	...RR.S......
Q9NYV4-332	Q9NYV4	332	...RR.S......
P00736-541	P00736	541	...RR.S......
Q15785-93	Q15785	93	...RR.S......
Q2PPJ7-373	Q2PPJ7	373	...RR.S......
Q92794-1089	Q92794	1089	...RR.S......
Q9BQK8-411	Q9BQK8	411	...RR.S......
Q13595-96	Q13595	96	...RR.S......
Q00G26-277	Q00G26	277	...RR.S......
Q9UQQ2-150	Q9UQQ2	150	...RR.S......
Q8N5V2-16	Q8N5V2	16	...RR.S......
Q10570-766	Q10570	766	...RR.S......
P32119-112	P32119	112	...RR.S......
Q8IY26-70	Q8IY26	70	...RR.S......
O94929-503	O94929	503	...RR.S......
Q9UK76-87	Q9UK76	87	...RR.S......
Q9UPQ0-377	Q9UPQ0	377	...RR.S......
Q9Y572-316	Q9Y572	316	...RR.S......
Q4L180-791	Q4L180	791	...RR.S......
P78347-784	P78347	784	...RR.S......
Q96E09-62	Q96E09	62	...RR.S......
Q5VT52-1099	Q5VT52	1099	...RR.S......
O15021-1373	O15021	1373	...RR.S......
P49207-12	P49207	12	...RR.S......
Q12929-685	Q12929	685	...RR.S......
O43290-448	O43290	448	...RR.S......
Q2M1Z3-1178	Q2M1Z3	1178	...RR.S......
Q9C0C2-1545	Q9C0C2	1545	...RR.S......
P46779-115	P46779	115	...RR.S......
O43166-1632	O43166	1632	...RR.S......
Q13595-236	Q13595	236	...RR.S......
Q96PE2-142	Q96PE2	142	...RR.S......
Q9NP71-614	Q9NP71	614	...RR.S......
Q1EHB4-594	Q1EHB4	594	...RR.S......
Q9NV29-121	Q9NV29	121	...RR.S......
C9JI98-124	C9JI98	124	...RR.S......
Q92576-1898	Q92576	1898	...RR.S......
Q53H47-508	Q53H47	508	...RR.S......
O00337-11	O00337	11	...RR.S......
Q9BW61-33	Q9BW61	33	...RR.S......
Q6ZN18-206	Q6ZN18	206	...RR.S......
P16949-63	P16949	63	...RR.S......
P06737-430	P06737	430	...RR.S......
Q13905-335	Q13905	335	...RR.S......
Q6ZNJ1-2739	Q6ZNJ1	2739	...RR.S......
Q5VTQ0-524	Q5VTQ0	524	...RR.S......
P53602-96	P53602	96	...RR.S......
O60307-747	O60307	747	...RR.S......
Q12770-822	Q12770	822	...RR.S......
P01024-672	P01024	672	...RR.S......
Q9GZU1-557	Q9GZU1	557	...RR.S......
Q08211-449	Q08211	449	...RR.S......
O60493-72	O60493	72	...RR.S......
Q6GYQ0-860	Q6GYQ0	860	...RR.S......
Q8WWI1-751	Q8WWI1	751	...RR.S......
Q8TE67-230	Q8TE67	230	...RR.S......
P15924-1127	P15924	1127	...RR.S......
O14579-99	O14579	99	...RR.S......
P57737-21	P57737	21	...RR.S......
P51957-661	P51957	661	...RR.S......
Q9BXJ7-426	Q9BXJ7	426	...RR.S......
Q99501-352	Q99501	352	...RR.S......
Q8NAV1-216	Q8NAV1	216	...RR.S......
O14558-16	O14558	16	...RR.S......
Q68DK2-144	Q68DK2	144	...RR.S......
Q12955-1459	Q12955	1459	...RR.S......
Q9BZ23-168	Q9BZ23	168	...RR.S......
Q9ULL1-610	Q9ULL1	610	...RR.S......
Q8TE77-37	Q8TE77	37	...RR.S......
P13861-99	P13861	99	...RR.S......
P50479-120	P50479	120	...RR.S......
Q69YQ0-832	Q69YQ0	832	...RR.S......
Q13506-395	Q13506	395	...RR.S......
O15020-2254	O15020	2254	...RR.S......
Q8NC56-134	Q8NC56	134	...RR.S......
Q96B23-66	Q96B23	66	...RR.S......
P00450-722	P00450	722	...RR.S......
Q9Y608-328	Q9Y608	328	...RR.S......
Q5T1M5-956	Q5T1M5	956	...RR.S......
O94915-1957	O94915	1957	...RR.S......
Q9UIG0-1342	Q9UIG0	1342	...RR.S......
Q8NHM5-795	Q8NHM5	795	...RR.S......
Q12802-1565	Q12802	1565	...RR.S......
Q6NT76-170	Q6NT76	170	...RR.S......
O43314-1006	O43314	1006	...RR.S......
Q96JP5-82	Q96JP5	82	...RR.S......
Q00G26-140	Q00G26	140	...RR.S......
Q9C0H9-859	Q9C0H9	859	...RR.S......
O60240-436	O60240	436	...RR.S......
Q9BTC0-1456	Q9BTC0	1456	...RR.S......
O14681-46	O14681	46	...RR.S......
Q8TDZ2-1057	Q8TDZ2	1057	...RR.S......
P08240-473	P08240	473	...RR.S......
Q5VT25-1545	Q5VT25	1545	...RR.S......
Q9Y2H5-448	Q9Y2H5	448	...RR.S......
Q14896-275	Q14896	275	...RR.S......
Q9NPG4-1140	Q9NPG4	1140	...RR.S......
Q14643-1598	Q14643	1598	...RR.S......
Q92804-375	Q92804	375	...RR.S......
Q86VZ1-324	Q86VZ1	324	...RR.S......
Q9BWE0-441	Q9BWE0	441	...RR.S......
Q8N201-1318	Q8N201	1318	...RR.S......
Q9H0K1-358	Q9H0K1	358	...RR.S......
Q7Z5R6-526	Q7Z5R6	526	...RR.S......
Q9UMX1-301	Q9UMX1	301	...RR.S......
Q86W92-794	Q86W92	794	...RR.S......
Q6P2H3-623	Q6P2H3	623	...RR.S......
Q5VZ89-1042	Q5VZ89	1042	...RR.S......
P35222-552	P35222	552	...RR.S......
Q9Y3M8-572	Q9Y3M8	572	...RR.S......
Q5T0N5-488	Q5T0N5	488	...RR.S......
P98095-578	P98095	578	...RR.S......
P22314-13	P22314	13	...RR.S......
P35568-1100	P35568	1100	...RR.S......
O95613-1814	O95613	1814	...RR.S......
Q6UY14-285	Q6UY14	285	...RR.S......
Q9UQ35-1690	Q9UQ35	1690	...RR.S......
Q13554-423	Q13554	423	...RR.S......
O43318-439	O43318	439	...RR.S......
Q9NZJ7-381	Q9NZJ7	381	...RR.S......
O94875-259	O94875	259	...RR.S......
O60658-457	O60658	457	...RR.S......
Q16696-131	Q16696	131	...RR.S......
Q9H307-96	Q9H307	96	...RR.S......
Q9Y259-39	Q9Y259	39	...RR.S......
Q92859-1214	Q92859	1214	...RR.S......
P15924-165	P15924	165	...RR.S......
Q6UX71-506	Q6UX71	506	...RR.S......
Q9UQ35-1923	Q9UQ35	1923	...RR.S......
Q96DC8-43	Q96DC8	43	...RR.S......
Q9NZN5-608	Q9NZN5	608	...RR.S......
O43294-403	O43294	403	...RR.S......
Q17RC7-80	Q17RC7	80	...RR.S......
Q9UQ35-2030	Q9UQ35	2030	...RR.S......
Q0VF96-297	Q0VF96	297	...RR.S......
Q6P1M3-847	Q6P1M3	847	...RR.S......
P08238-452	P08238	452	...RR.S......
P07359-629	P07359	629	...RR.S......
O75494-129	O75494	129	...RR.S......
Q13370-442	Q13370	442	...RR.S......
O43521-87	O43521	87	...RR.S......
Q9Y383-384	Q9Y383	384	...RR.S......
P62753-235	P62753	235	...RR.S......
Q9BRD0-201	Q9BRD0	201	......SP.R...
Q9BRD0-325	Q9BRD0	325	......SP.R...
Q9UKV3-388	Q9UKV3	388	......SP.R...
Q9NUJ3-56	Q9NUJ3	56	......SP.R...
P52701-137	P52701	137	......SP.R...
Q8NEN9-521	Q8NEN9	521	......SP.R...
Q1MSJ5-459	Q1MSJ5	459	......SP.R...
P20749-374	P20749	374	......SP.R...
Q9BRD0-163	Q9BRD0	163	......SP.R...
Q12983-66	Q12983	66	......SP.R...
P18583-2031	P18583	2031	......SP.R...
Q14498-136	Q14498	136	......SP.R...
Q9UGJ0-113	Q9UGJ0	113	......SP.R...
Q9P2Q2-694	Q9P2Q2	694	......SP.R...
Q13427-397	Q13427	397	......SP.R...
Q14669-1016	Q14669	1016	......SP.R...
Q96LT9-21	Q96LT9	21	......SP.R...
Q8WYP5-1218	Q8WYP5	1218	......SP.R...
P51858-165	P51858	165	......SP.R...
Q8IXT5-254	Q8IXT5	254	......SP.R...
P46087-786	P46087	786	......SP.R...
Q9UQ35-1179	Q9UQ35	1179	......SP.R...
P49792-837	P49792	837	......SP.R...
Q99959-155	Q99959	155	......SP.R...
P49736-27	P49736	27	......SP.R...
Q15643-1891	Q15643	1891	......SP.R...
Q8WUA4-167	Q8WUA4	167	......SP.R...
O95251-57	O95251	57	......SP.R...
Q02410-386	Q02410	386	......SP.R...
Q9UQ35-353	Q9UQ35	353	......SP.R...
P09601-229	P09601	229	......SP.R...
P18583-1952	P18583	1952	......SP.R...
Q15773-238	Q15773	238	......SP.R...
Q15596-29	Q15596	29	......SP.R...
Q96T37-670	Q96T37	670	......SP.R...
Q8WYP5-1222	Q8WYP5	1222	......SP.R...
Q5VUA4-464	Q5VUA4	464	......SP.R...
Q69YN4-173	Q69YN4	173	......SP.R...
Q9UQ88-222	Q9UQ88	222	......SP.R...
Q13098-468	Q13098	468	......SP.R...
Q02040-633	Q02040	633	......SP.R...
P46379-1117	P46379	1117	......SP.R...
Q8IUD2-17	Q8IUD2	17	......SP.R...
Q7Z309-119	Q7Z309	119	......SP.R...
Q99590-818	Q99590	818	......SP.R...
Q9UQ35-895	Q9UQ35	895	......SP.R...
Q96E09-147	Q96E09	147	......SP.R...
Q9NQ92-66	Q9NQ92	66	......SP.R...
Q9UKV3-1004	Q9UKV3	1004	......SP.R...
P51957-563	P51957	563	......SP.R...
P61978-284	P61978	284	......SP.R...
O75764-140	O75764	140	......SP.R...
Q7Z6E9-1277	Q7Z6E9	1277	......SP.R...
Q49AM3-278	Q49AM3	278	......SP.R...
Q9UQ35-1112	Q9UQ35	1112	......SP.R...
Q96GP6-653	Q96GP6	653	......SP.R...
Q8IYB3-431	Q8IYB3	431	......SP.R...
O95425-920	O95425	920	......SP.R...
O75764-115	O75764	115	......SP.R...
Q92530-153	Q92530	153	......SP.R...
P29692-133	P29692	133	......SP.R...
P49736-41	P49736	41	......SP.R...
Q9UQ35-1320	Q9UQ35	1320	......SP.R...
Q99569-337	Q99569	337	......SP.R...
Q9BX66-945	Q9BX66	945	......SP.R...
Q96K21-463	Q96K21	463	......SP.R...
Q66K74-657	Q66K74	657	......SP.R...
Q13207-386	Q13207	386	......SP.R...
O60941-394	O60941	394	......SP.R...
Q99590-882	Q99590	882	......SP.R...
Q9NYF8-268	Q9NYF8	268	......SP.R...
Q14CZ8-377	Q14CZ8	377	......SP.R...
Q9H4L4-307	Q9H4L4	307	......SP.R...
P11137-1782	P11137	1782	......SP.R...
Q9H792-281	Q9H792	281	......SP.R...
Q9BXI6-383	Q9BXI6	383	......SP.R...
O15027-1786	O15027	1786	......SP.R...
Q86W50-329	Q86W50	329	......SP.R...
Q08495-16	Q08495	16	......SP.R...
Q9ULM3-118	Q9ULM3	118	......SP.R...
Q8IWB9-790	Q8IWB9	790	......SP.R...
Q9NZN8-165	Q9NZN8	165	......SP.R...
Q8N1G0-1057	Q8N1G0	1057	......SP.R...
Q9H8T0-30	Q9H8T0	30	......SP.R...
Q15696-349	Q15696	349	......SP.R...
Q9ULI0-318	Q9ULI0	318	......SP.R...
Q9H8M2-566	Q9H8M2	566	......SP.R...
Q9C0C2-178	Q9C0C2	178	......SP.R...
Q13573-232	Q13573	232	......SP.R...
Q9UPT8-1275	Q9UPT8	1275	......SP.R...
Q9H7N4-725	Q9H7N4	725	......SP.R...
Q63ZY6-143	Q63ZY6	143	......SP.R...
P49796-806	P49796	806	......SP.R...
Q8NE01-700	Q8NE01	700	......SP.R...
O95671-21	O95671	21	......SP.R...
Q7Z6E9-861	Q7Z6E9	861	......SP.R...
P52948-839	P52948	839	......SP.R...
O00303-258	O00303	258	......SP.R...
O75781-116	O75781	116	......SP.R...
Q969U6-275	Q969U6	275	......SP.R...
Q7RTP6-1221	Q7RTP6	1221	......SP.R...
Q92994-553	Q92994	553	......SP.R...
P48634-808	P48634	808	......SP.R...
O43187-144	O43187	144	......SP.R...
P11171-712	P11171	712	......SP.R...
C9J069-856	C9J069	856	......SP.R...
P21333-1084	P21333	1084	......SP.R...
Q96SN8-1887	Q96SN8	1887	......SP.R...
P28290-746	P28290	746	......SP.R...
P30038-44	P30038	44	......SP.R...
Q96JM3-204	Q96JM3	204	K.....SP.....
Q15652-943	Q15652	943	K.....SP.....
Q659C4-633	Q659C4	633	K.....SP.....
P18583-283	P18583	283	K.....SP.....
Q13523-257	Q13523	257	K.....SP.....
P29374-864	P29374	864	K.....SP.....
P42677-11	P42677	11	K.....SP.....
P52701-830	P52701	830	K.....SP.....
Q9BZD4-247	Q9BZD4	247	K.....SP.....
Q9UKN8-611	Q9UKN8	611	K.....SP.....
Q9H1E3-181	Q9H1E3	181	K.....SP.....
P46013-2828	P46013	2828	K.....SP.....
Q8IYB3-738	Q8IYB3	738	K.....SP.....
Q9NZ63-261	Q9NZ63	261	K.....SP.....
O00515-177	O00515	177	K.....SP.....
Q8NI27-1417	Q8NI27	1417	K.....SP.....
Q9NSK0-460	Q9NSK0	460	K.....SP.....
Q92922-330	Q92922	330	K.....SP.....
Q07866-460	Q07866	460	K.....SP.....
Q6JBY9-83	Q6JBY9	83	K.....SP.....
Q14978-538	Q14978	538	K.....SP.....
Q92576-283	Q92576	283	K.....SP.....
Q8IYB3-638	Q8IYB3	638	K.....SP.....
Q14966-1401	Q14966	1401	K.....SP.....
Q9UHB6-609	Q9UHB6	609	K.....SP.....
Q13459-1242	Q13459	1242	K.....SP.....
Q9P2J2-809	Q9P2J2	809	K.....SP.....
Q96CP2-21	Q96CP2	21	K.....SP.....
P49792-3207	P49792	3207	K.....SP.....
Q5BKZ1-270	Q5BKZ1	270	K.....SP.....
Q9NYF8-512	Q9NYF8	512	K.....SP.....
Q96JM3-405	Q96JM3	405	K.....SP.....
O15055-627	O15055	627	K.....SP.....
Q9H307-443	Q9H307	443	K.....SP.....
Q8TAQ2-347	Q8TAQ2	347	K.....SP.....
Q14004-525	Q14004	525	K.....SP.....
Q09666-5731	Q09666	5731	K.....SP.....
Q68CZ2-1149	Q68CZ2	1149	K.....SP.....
Q13459-717	Q13459	717	K.....SP.....
Q5THJ4-1138	Q5THJ4	1138	K.....SP.....
P14317-275	P14317	275	K.....SP.....
Q16666-106	Q16666	106	K.....SP.....
Q9NZT2-315	Q9NZT2	315	K.....SP.....
Q9UI08-354	Q9UI08	354	K.....SP.....
O94875-157	O94875	157	K.....SP.....
Q9UKK3-1186	Q9UKK3	1186	K.....SP.....
Q8WWM7-559	Q8WWM7	559	K.....SP.....
P19474-266	P19474	266	K.....SP.....
A1L390-631	A1L390	631	K.....SP.....
P09661-197	P09661	197	K.....SP.....
Q9UKS6-319	Q9UKS6	319	K.....SP.....
O00499-298	O00499	298	K.....SP.....
P55196-1779	P55196	1779	K.....SP.....
Q13427-745	Q13427	745	K.....SP.....
P51608-229	P51608	229	K.....SP.....
O60885-1117	O60885	1117	K.....SP.....
Q5T200-242	Q5T200	242	K.....SP.....
O43583-73	O43583	73	K.....SP.....
P08651-333	P08651	333	K.....SP.....
Q15678-594	Q15678	594	K.....SP.....
Q16181-334	Q16181	334	K.....SP.....
Q9NWH9-553	Q9NWH9	553	K.....SP.....
P49756-677	P49756	677	K.....SP.....
Q96CB8-128	Q96CB8	128	K.....SP.....
P20823-93	P20823	93	K.....SP.....
Q96SB4-311	Q96SB4	311	K.....SP.....
Q9Y2W1-320	Q9Y2W1	320	K.....SP.....
Q5VWN6-1172	Q5VWN6	1172	K.....SP.....
Q05519-449	Q05519	449	K.....SP.....
P49757-634	P49757	634	K.....SP.....
Q8NB78-17	Q8NB78	17	K.....SP.....
Q8IVL1-1480	Q8IVL1	1480	K.....SP.....
P42331-533	P42331	533	K.....SP.....
Q92610-1089	Q92610	1089	K.....SP.....
O60566-1043	O60566	1043	K.....SP.....
Q8NCP5-161	Q8NCP5	161	.R....SP.....
Q9UQ35-456	Q9UQ35	456	.R....SP.....
Q9UKT5-12	Q9UKT5	12	.R....SP.....
Q63HR2-832	Q63HR2	832	.R....SP.....
O75400-885	O75400	885	.R....SP.....
P10644-83	P10644	83	.R....SP.....
Q66K74-592	Q66K74	592	.R....SP.....
Q5T8P6-127	Q5T8P6	127	.R....SP.....
Q9P1Y5-341	Q9P1Y5	341	.R....SP.....
O43683-655	O43683	655	.R....SP.....
P17812-575	P17812	575	.R....SP.....
Q9H1B7-659	Q9H1B7	659	.R....SP.....
Q13523-431	Q13523	431	.R....SP.....
Q9UQ35-437	Q9UQ35	437	.R....SP.....
Q5SYE7-1388	Q5SYE7	1388	.R....SP.....
Q9Y618-2269	Q9Y618	2269	.R....SP.....
Q63HR2-931	Q63HR2	931	.R....SP.....
Q9NYV4-276	Q9NYV4	276	.R....SP.....
Q13243-233	Q13243	233	.R....SP.....
Q9GZR1-352	Q9GZR1	352	.R....SP.....
Q92609-554	Q92609	554	.R....SP.....
P14618-37	P14618	37	.R....SP.....
Q9UQ35-1073	Q9UQ35	1073	.R....SP.....
Q92574-505	Q92574	505	.R....SP.....
Q09666-93	Q09666	93	.R....SP.....
O75362-407	O75362	407	.R....SP.....
Q14004-383	Q14004	383	.R....SP.....
Q58WW2-336	Q58WW2	336	.R....SP.....
O15119-432	O15119	432	.R....SP.....
O15085-1413	O15085	1413	.R....SP.....
Q99959-151	Q99959	151	.R....SP.....
Q7Z2W4-275	Q7Z2W4	275	.R....SP.....
Q8TEC5-649	Q8TEC5	649	.R....SP.....
Q71RC2-597	Q71RC2	597	.R....SP.....
Q53SF7-987	Q53SF7	987	.R....SP.....
Q9HCE3-314	Q9HCE3	314	.R....SP.....
Q8IV50-24	Q8IV50	24	.R....SP.....
Q14526-313	Q14526	313	.R....SP.....
P48634-1306	P48634	1306	.R....SP.....
Q9ULD9-964	Q9ULD9	964	.R....SP.....
Q96JY6-124	Q96JY6	124	.R....SP.....
O95049-319	O95049	319	.R....SP.....
P53621-173	P53621	173	.R....SP.....
Q3KQU3-116	Q3KQU3	116	.R....SP.....
O76054-9	O76054	9	.R....SP.....
O94979-1163	O94979	1163	.R....SP.....
Q13905-281	Q13905	281	.R....SP.....
Q03164-2098	Q03164	2098	.R....SP.....
P02730-350	P02730	350	.R....SP.....
O43741-184	O43741	184	.R....SP.....
Q5TCZ1-421	Q5TCZ1	421	.R....SP.....
Q969E4-121	Q969E4	121	.R....SP.....
O76041-953	O76041	953	.R....SP.....
Q7Z4S6-1212	Q7Z4S6	1212	.R....SP.....
Q96MM6-25	Q96MM6	25	.R....SP.....
Q5TGY3-896	Q5TGY3	896	.R....SP.....
Q92786-179	Q92786	179	.R....SP.....
Q8TEH3-523	Q8TEH3	523	.R....SP.....
P38432-566	P38432	566	.R....SP.....
Q9ULD4-400	Q9ULD4	400	.R....SP.....
Q9Y4B4-1155	Q9Y4B4	1155	.R....SP.....
P00533-991	P00533	991	.R....SP.....
P29590-38	P29590	38	.R....SP.....
O43491-598	O43491	598	.R....SP.....
Q8IYB3-715	Q8IYB3	715	.R....SP.....
O75781-162	O75781	162	.R....SP.....
P18206-290	P18206	290	.R....SP.....
P38159-208	P38159	208	.R....SP.....
Q9NYF3-234	Q9NYF3	234	.R....SP.....
Q8IU81-453	Q8IU81	453	.R....SP.....
Q7Z2W4-378	Q7Z2W4	378	.R....SP.....
Q7KZF4-781	Q7KZF4	781	.R....SP.....
Q9NZL9-282	Q9NZL9	282	.R....SP.....
Q14004-439	Q14004	439	.R....SP.....
Q9Y2W1-919	Q9Y2W1	919	.R....SP.....
Q12830-2370	Q12830	2370	.R....SP.....
Q14258-100	Q14258	100	.R....SP.....
Q9Y3E2-81	Q9Y3E2	81	.R....SP.....
Q6WKZ4-529	Q6WKZ4	529	.R....SP.....
P14923-182	P14923	182	.R....SP.....
Q9Y3T9-49	Q9Y3T9	49	.R....SP.....
Q9UQ35-2032	Q9UQ35	2032	...RS.S......
Q9UQ35-2044	Q9UQ35	2044	...RS.S......
Q63HR2-120	Q63HR2	120	...RS.S......
Q9UQ35-2020	Q9UQ35	2020	...RS.S......
Q9UQ35-1878	Q9UQ35	1878	...RS.S......
Q9UQ35-1925	Q9UQ35	1925	...RS.S......
Q8IWX8-815	Q8IWX8	815	...RS.S......
Q13595-98	Q13595	98	...RS.S......
Q13595-86	Q13595	86	...RS.S......
Q9NXX6-30	Q9NXX6	30	...RS.S......
P11532-3623	P11532	3623	...RS.S......
Q92934-99	Q92934	99	...RS.S......
Q86X10-359	Q86X10	359	...RS.S......
P78549-22	P78549	22	...RS.S......
O75494-133	O75494	133	...RS.S......
Q01130-189	Q01130	189	...RS.S......
Q9Y2W1-53	Q9Y2W1	53	...RS.S......
Q8ND76-326	Q8ND76	326	...RS.S......
Q8IYB3-308	Q8IYB3	308	...RS.S......
Q9UQ35-1443	Q9UQ35	1443	...RS.S......
P18583-2011	P18583	2011	...RS.S......
Q86X29-530	Q86X29	530	...RS.S......
Q5U651-328	Q5U651	328	...RS.S......
Q9UQ35-1854	Q9UQ35	1854	...RS.S......
Q9UQ35-952	Q9UQ35	952	...RS.S......
Q9H6H4-152	Q9H6H4	152	...RS.S......
P40818-718	P40818	718	...RS.S......
P28290-739	P28290	739	...RS.S......
Q9BYB0-375	Q9BYB0	375	...RS.S......
Q13595-84	Q13595	84	...RS.S......
Q12774-606	Q12774	606	...RS.S......
Q9Y2I7-307	Q9Y2I7	307	...RS.S......
Q9BZL4-452	Q9BZL4	452	...RS.S......
Q13480-266	Q13480	266	...RS.S......
O00712-264	O00712	264	...RS.S......
Q09666-5782	Q09666	5782	...RS.S......
P10398-582	P10398	582	...RS.S......
Q9BYB0-802	Q9BYB0	802	...RS.S......
Q16629-157	Q16629	157	...RS.S......
Q96TC7-46	Q96TC7	46	...RS.S......
Q00587-192	Q00587	192	...RS.S......
O00515-394	O00515	394	...RS.S......
Q86Z20-504	Q86Z20	504	...RS.S......
O95155-105	O95155	105	...RS.S......
Q6ZS17-22	Q6ZS17	22	...RS.S......
P21731-331	P21731	331	...RS.S......
Q6JBY9-179	Q6JBY9	179	...RS.S......
Q9UQ35-780	Q9UQ35	780	...RS.S......
O15085-614	O15085	614	...RS.S......
P18615-251	P18615	251	...RS.S......
Q9UQ35-2692	Q9UQ35	2692	...RS.S......
Q8N7R7-344	Q8N7R7	344	...RS.S......
O75494-131	O75494	131	...RS.S......
Q9H694-803	Q9H694	803	...RS.S......
P54646-491	P54646	491	...RS.S......
Q6ZV29-355	Q6ZV29	355	...RS.S......
Q8WX93-1118	Q8WX93	1118	...RS.S......
O75995-27	O75995	27	...RS.S......
Q9P1Y5-431	Q9P1Y5	431	...RS.S......
Q6P1L5-273	Q6P1L5	273	...RS.S......
Q9UQ35-704	Q9UQ35	704	...RS.S......
P18615-115	P18615	115	...RS.S......
Q9Y4F5-1114	Q9Y4F5	1114	...RS.S......
Q9Y4F9-21	Q9Y4F9	21	...RS.S......
Q13243-231	Q13243	231	...RS.S......
Q96FS4-55	Q96FS4	55	...RS.S......
P52298-13	P52298	13	...RS.S......
Q8IYB3-306	Q8IYB3	306	...RS.S......
Q12802-2563	Q12802	2563	...RS.S......
P12956-477	P12956	477	...RS.S......
P62995-87	P62995	87	...RS.S......
Q14678-325	Q14678	325	...RS.S......
P15924-2209	P15924	2209	...RS.S......
Q9UMZ2-1075	Q9UMZ2	1075	...RS.S......
Q9UKV5-509	Q9UKV5	509	...RS.S......
Q92667-107	Q92667	107	...RS.S......
O60271-730	O60271	730	...RS.S......
Q8NHG8-82	Q8NHG8	82	...RS.S......
O60759-66	O60759	66	...RS.S......
P26045-359	P26045	359	...RS.S......
O15320-139	O15320	139	...RS.S......
Q86VQ1-223	Q86VQ1	223	...RS.S......
Q9Y2G3-1154	Q9Y2G3	1154	...RS.S......
Q08AD1-464	Q08AD1	464	...RS.S......
Q9UQ35-1101	Q9UQ35	1101	...RS.S......
Q93100-27	Q93100	27	...RS.S......
O43933-1211	O43933	1211	...RS.S......
Q9Y580-136	Q9Y580	136	...RS.S......
Q13263-473	Q13263	473	...RS.S......
P05093-258	P05093	258	...RS.S......
Q9UQ35-1541	Q9UQ35	1541	...RS.S......
Q9P2M7-131	Q9P2M7	131	...RS.S......
Q01130-206	Q01130	206	...RS.S......
P47736-441	P47736	441	...RS.S......
Q96PE2-735	Q96PE2	735	...RS.S......
Q16629-181	Q16629	181	...RS.S......
Q9P2M7-149	Q9P2M7	149	...RS.S......
O75592-2833	O75592	2833	...RS.S......
Q9H6S3-368	Q9H6S3	368	...RS.S......
Q9HBL0-621	Q9HBL0	621	...RS.S......
Q14739-99	Q14739	99	...RS.S......
I3L1I5-155	I3L1I5	155	...RS.S......
Q9UJM3-251	Q9UJM3	251	...RS.S......
Q7Z6E9-684	Q7Z6E9	684	...RS.S......
Q8WWI1-1493	Q8WWI1	1493	...RS.S......
Q6IQ23-556	Q6IQ23	556	...RS.S......
Q9NYF3-122	Q9NYF3	122	...RS.S......
Q86WR7-43	Q86WR7	43	...RS.S......
Q16629-183	Q16629	183	...RS.S......
Q5T9C2-251	Q5T9C2	251	...RS.S......
Q96RR4-511	Q96RR4	511	...RS.S......
Q8IZD4-275	Q8IZD4	275	...RS.S......
Q8TF47-511	Q8TF47	511	...RS.S......
O15085-635	O15085	635	...RS.S......
Q9UGP4-316	Q9UGP4	316	...RS.S......
Q15032-282	Q15032	282	...RS.S......
Q86YD1-36	Q86YD1	36	...RS.S......
P78314-427	P78314	427	...RS.S......
Q7Z401-1589	Q7Z401	1589	...RS.S......
Q92622-410	Q92622	410	...RS.S......
Q8IYB3-754	Q8IYB3	754	...RS.S......
Q07666-20	Q07666	20	...RS.S......
O14874-33	O14874	33	...RS.S......
O43166-288	O43166	288	...RS.S......
Q8N137-80	Q8N137	80	...RS.S......
Q92945-193	Q92945	193	...RS.S......
Q15149-1047	Q15149	1047	...RS.S......
Q92805-30	Q92805	30	...RS.S......
Q04637-1187	Q04637	1187	...RS.S......
Q92625-647	Q92625	647	...RS.S......
Q14839-105	Q14839	105	...RS.S......
Q9BTU6-462	Q9BTU6	462	...RS.S......
Q9NYL2-567	Q9NYL2	567	...RS.S......
Q5T011-1642	Q5T011	1642	...RS.S......
Q14449-372	Q14449	372	...RS.S......
Q9UI08-331	Q9UI08	331	...RS.S......
Q8IZJ1-528	Q8IZJ1	528	...RS.S......
Q8N684-48	Q8N684	48	...RS.S......
Q15811-315	Q15811	315	...RS.S......
Q9C0J8-1279	Q9C0J8	1279	...RS.S......
P08670-7	P08670	7	...RS.S......
O60238-166	O60238	166	...RS.S......
O60716-861	O60716	861	...RS.S......
Q9Y520-1544	Q9Y520	1544	...RS.S......
O00443-338	O00443	338	...RS.S......
Q99569-512	Q99569	512	...RS.S......
O14639-452	O14639	452	...RS.S......
Q6ZUJ8-642	Q6ZUJ8	642	...RS.S......
P62995-22	P62995	22	...RS.S......
Q5VT25-1629	Q5VT25	1629	...RS.S......
Q9UN36-346	Q9UN36	346	...RS.S......
O95210-138	O95210	138	...RS.S......
Q13242-189	Q13242	189	...RS.S......
Q9UQ35-706	Q9UQ35	706	...RS.S......
A0FGR8-738	A0FGR8	738	...RS.S......
P37173-553	P37173	553	...RS.S......
Q15149-4386	Q15149	4386	...RS.S......
Q8WXF0-156	Q8WXF0	156	...RS.S......
P84103-152	P84103	152	...RS.S......
Q07955-201	Q07955	201	...RS.S......
Q96EV2-205	Q96EV2	205	......SD.E.E.
P07900-231	P07900	231	......SD.E.E.
P52948-888	P52948	888	......SD.E.E.
P08238-226	P08238	226	......SD.E.E.
P49736-139	P49736	139	......SD.E.E.
Q9UDY2-1159	Q9UDY2	1159	......SD.E.E.
Q8WVC0-630	Q8WVC0	630	......SD.E.E.
Q9H0D6-499	Q9H0D6	499	......SD.E.E.
Q9P035-114	Q9P035	114	......SD.E.E.
Q13895-98	Q13895	98	......SD.E.E.
Q8WVC0-658	Q8WVC0	658	......SD.E.E.
Q8TF01-290	Q8TF01	290	......SD.E.E.
Q92769-422	Q92769	422	......SD.E.E.
P29692-162	P29692	162	......SD.E.E.
Q8WWQ0-1281	Q8WWQ0	1281	......SD.E.E.
P24534-106	P24534	106	......SD.E.E.
Q13547-421	Q13547	421	......SD.E.E.
P52756-624	P52756	624	......SD.E.E.
Q5JSZ5-388	Q5JSZ5	388	......SD.E.E.
Q96ST2-438	Q96ST2	438	......SD.E.E.
P25205-711	P25205	711	......SD.E.E.
Q9NZN4-438	Q9NZN4	438	......SD.E.E.
P18583-2129	P18583	2129	......SD.E.E.
Q96HR8-315	Q96HR8	315	......SD.E.E.
Q9H1C4-550	Q9H1C4	550	......SD.E.E.
P35221-641	P35221	641	......SD.E.E.
Q8IYB7-875	Q8IYB7	875	......SD.E.E.
P55081-53	P55081	53	......SD.E.E.
P98175-736	P98175	736	......SD.E.E.
Q86VR2-258	Q86VR2	258	......SD.E.E.
Q96ST2-398	Q96ST2	398	......SD.E.E.
Q9P1Y6-915	Q9P1Y6	915	......SD.E.E.
Q96ST3-832	Q96ST3	832	......SD.E.E.
P07900-263	P07900	263	......SD.E.E.
Q96ST2-261	Q96ST2	261	......SD.E.E.
Q96ST2-235	Q96ST2	235	......SD.E.E.
Q96ST2-196	Q96ST2	196	......SD.E.E.
Q96ST2-287	Q96ST2	287	......SD.E.E.
Q00059-193	Q00059	193	......SD.E.E.
P35251-69	P35251	69	......SD.E.E.
Q9HCL2-688	Q9HCL2	688	......SD.E.E.
Q9BPX3-674	Q9BPX3	674	......SD.E.E.
Q5VZL5-122	Q5VZL5	122	......SD.E.E.
P55081-116	P55081	116	......SD.E.E.
Q9UP95-967	Q9UP95	967	......SD.E.E.
Q7Z6Z7-1907	Q7Z6Z7	1907	......SD.E.E.
O75351-102	O75351	102	......SD.E.E.
Q8N3X1-499	Q8N3X1	499	......SD.E.E.
Q13769-314	Q13769	314	......SD.E.E.
O75400-888	O75400	888	......SD.E.E.
O75475-273	O75475	273	......SD.E.E.
P60484-385	P60484	385	......SD.E.E.
P42167-67	P42167	67	......SD.E.E.
Q8NE71-109	Q8NE71	109	......SD.E.E.
Q8N1G2-53	Q8N1G2	53	......SD.E.E.
O75475-106	O75475	106	......SD.E.E.
Q8WUX9-417	Q8WUX9	417	......SD.E.E.
Q13428-906	Q13428	906	......SP.K...
Q13428-381	Q13428	381	......SP.K...
Q13428-446	Q13428	446	......SP.K...
Q9UQB3-276	Q9UQB3	276	......SP.K...
Q9NYF8-177	Q9NYF8	177	......SP.K...
Q68EM7-575	Q68EM7	575	......SP.K...
Q9NXC5-766	Q9NXC5	766	......SP.K...
Q9BTC8-519	Q9BTC8	519	......SP.K...
P16401-18	P16401	18	......SP.K...
Q12888-1362	Q12888	1362	......SP.K...
Q02040-537	Q02040	537	......SP.K...
P46100-598	P46100	598	......SP.K...
P49321-726	P49321	726	......SP.K...
Q9BUH6-148	Q9BUH6	148	......SP.K...
Q53SF7-897	Q53SF7	897	......SP.K...
Q9UNE7-19	Q9UNE7	19	......SP.K...
P98082-401	P98082	401	......SP.K...
P25054-1360	P25054	1360	......SP.K...
Q7Z5K2-226	Q7Z5K2	226	......SP.K...
Q9UQ88-577	Q9UQ88	577	......SP.K...
P33316-99	P33316	99	......SP.K...
P27816-280	P27816	280	......SP.K...
Q8IXJ6-368	Q8IXJ6	368	......SP.K...
P19338-67	P19338	67	......SP.K...
Q6MZP7-310	Q6MZP7	310	......SP.K...
Q92576-1133	Q92576	1133	......SP.K...
Q86YS7-295	Q86YS7	295	......SP.K...
Q9NWZ5-56	Q9NWZ5	56	......SP.K...
Q8TBN0-179	Q8TBN0	179	......SP.K...
P60468-17	P60468	17	......SP.K...
P34897-266	P34897	266	......SP.K...
P06748-70	P06748	70	......SP.K...
Q9ULM3-367	Q9ULM3	367	......SP.K...
Q9NY27-226	Q9NY27	226	......SP.K...
P46013-584	P46013	584	......SP.K...
Q8WYQ5-377	Q8WYQ5	377	......SP.K...
Q8TE77-87	Q8TE77	87	......SP.K...
O43166-1270	O43166	1270	......SP.K...
Q6VMQ6-477	Q6VMQ6	477	......SP.K...
Q8NEF9-203	Q8NEF9	203	......SP.K...
O60934-432	O60934	432	......SP.K...
Q12888-1678	Q12888	1678	......SP.K...
O14523-468	O14523	468	......SP.K...
O14617-829	O14617	829	......SP.K...
Q16512-562	Q16512	562	......SP.K...
Q14157-609	Q14157	609	......SP.K...
O14681-330	O14681	330	......SP.K...
Q6IQ23-907	Q6IQ23	907	......SP.K...
O43719-453	O43719	453	......SP.K...
Q8NB78-247	Q8NB78	247	......SP.K...
P14859-448	P14859	448	......SP.K...
Q13428-1378	Q13428	1378	......SP.K...
Q8WVV4-76	Q8WVV4	76	......SP.K...
Q9UFC0-212	Q9UFC0	212	......SP.K...
Q9H410-58	Q9H410	58	......SP.K...
P48651-442	P48651	442	......SP.K...
P08651-323	P08651	323	......SP.K...
Q8NFC6-1531	Q8NFC6	1531	......SP.K...
Q13459-1115	Q13459	1115	......SP.K...
Q9NYQ3-184	Q9NYQ3	184	......SP.K...
Q96T23-1345	Q96T23	1345	......SDEE...
Q9P0P8-106	Q9P0P8	106	......SDEE...
Q8TDD1-782	Q8TDD1	782	......SDEE...
Q9NQ55-359	Q9NQ55	359	......SDEE...
Q9NVU7-585	Q9NVU7	585	......SDEE...
P35579-1943	P35579	1943	......SDEE...
P08238-255	P08238	255	......SDEE...
P48634-350	P48634	350	......SDEE...
Q9UKS6-354	Q9UKS6	354	......SDEE...
Q15459-329	Q15459	329	......SDEE...
Q6PKG0-627	Q6PKG0	627	......SDEE...
O75379-30	O75379	30	......SDEE...
O95365-337	O95365	337	......SDEE...
Q13610-50	Q13610	50	......SDEE...
Q5H9R7-617	Q5H9R7	617	......SDEE...
P51858-133	P51858	133	......SDEE...
O95400-49	O95400	49	......SDEE...
P51531-1572	P51531	1572	......SDEE...
Q8IWA0-782	Q8IWA0	782	......SDEE...
Q14677-234	Q14677	234	......SDEE...
O00264-181	O00264	181	......SDEE...
P04114-4048	P04114	4048	......SDEE...
P13796-7	P13796	7	......SDEE...
Q14137-127	Q14137	127	......SDEE...
Q9UPU7-957	Q9UPU7	957	......SDEE...
Q14155-694	Q14155	694	......SDEE...
Q8WX93-893	Q8WX93	893	......SDEE...
O43395-619	O43395	619	......SDEE...
Q96KC8-480	Q96KC8	480	......SDEE...
Q01831-884	Q01831	884	......SDEE...
Q9C0C2-1621	Q9C0C2	1621	......SDEE...
P46100-677	P46100	677	......SDEE...
P48634-342	P48634	342	......SDEE...
Q9ULL5-561	Q9ULL5	561	......SDEE...
Q12789-1068	Q12789	1068	......SDEE...
Q96ST2-400	Q96ST2	400	......SE.EE..
Q8WWQ0-1283	Q8WWQ0	1283	......SE.EE..
Q96ST2-198	Q96ST2	198	......SE.EE..
Q96ST2-289	Q96ST2	289	......SE.EE..
Q96ST2-263	Q96ST2	263	......SE.EE..
Q96ST2-237	Q96ST2	237	......SE.EE..
O95831-118	O95831	118	......SE.EE..
P49792-2668	P49792	2668	......SE.EE..
Q13442-63	Q13442	63	......SE.EE..
Q13286-14	Q13286	14	......SE.EE..
Q8N9B5-974	Q8N9B5	974	......SE.EE..
Q86X95-202	Q86X95	202	......SE.EE..
P13861-78	P13861	78	......SE.EE..
Q99613-39	Q99613	39	......SE.EE..
P35659-32	P35659	32	......SE.EE..
Q9GZR7-82	Q9GZR7	82	......SE.EE..
Q96G23-349	Q96G23	349	......SE.EE..
Q5JTH9-1080	Q5JTH9	1080	......SE.EE..
P06748-125	P06748	125	......SE.EE..
P23497-157	P23497	157	......SE.EE..
Q15059-563	Q15059	563	......SE.EE..
P18858-66	P18858	66	......SE.EE..
Q13435-309	Q13435	309	......SE.EE..
Q96QR8-304	Q96QR8	304	......SE.EE..
P45973-14	P45973	14	......SE.EE..
Q8NAV1-194	Q8NAV1	194	......SE.EE..
P35251-71	P35251	71	......SE.EE..
P55081-133	P55081	133	......SE.EE..
P49756-583	P49756	583	......SE.EE..
Q8N3V7-263	Q8N3V7	263	......SE.EE..
Q13428-171	Q13428	171	......SE.EE..
Q8N573-204	Q8N573	204	......SE.EE..
Q8NF91-8305	Q8NF91	8305	......SE.EE..
Q92504-276	Q92504	276	......SE.EE..
Q5TAQ9-99	Q5TAQ9	99	......SE.EE..
Q9H2P0-921	Q9H2P0	921	......SE.EE..
Q8IYB3-463	Q8IYB3	463	......SE.EE..
Q13428-88	Q13428	88	......SE.EE..
Q9Y5B6-191	Q9Y5B6	191	......SE.EE..
Q99733-125	Q99733	125	......SE.EE..
Q5T8D3-200	Q5T8D3	200	......SE.EE..
O60341-166	O60341	166	......SE.EE..
Q01082-2165	Q01082	2165	...K..SP.....
Q96T58-1006	Q96T58	1006	...K..SP.....
Q9P206-669	Q9P206	669	...K..SP.....
[truncated: 3,525 more rows]
